# Supplementary material for: Visceral Obesity in Non-Small Cell Lung Cancer
Source: MDPI journal article supplement (doi:10.3390/cancers14143450), 2022-07-15
Supplement: s1 [file s1]

## **Supplemental material**

Nitsche L, Vedire Y, Kannisto E, et al. Visceral obesity in non-small cell lung cancer. 2022.

### *Content*

1. Table S1. Characteristics of the examined population.
2. Table S2. STROBE statement with items recommended for reports of cohort studies.
3. Table S3. Sex-specific characteristics of the population examined at the L3 vertebral level.

**Table S1.** Characteristics of the examined population<sup>a</sup>

| Age at tumor diagnosis (years) | Sex | Race  | Tobacco smoking history at tumor diagnosis | Year of surgery/biopsy of tumor | Pathological tumor stage | Tumor histology | Body mass index | Year of CT scan | Vertebral level for fat area measurement | Subcutaneous fat area (mm <sup>2</sup> ) | Visceral fat area (mm <sup>2</sup> ) |
|--------------------------------|-----|-------|--------------------------------------------|---------------------------------|--------------------------|-----------------|-----------------|-----------------|------------------------------------------|------------------------------------------|--------------------------------------|
| 72                             | F   | White |                                            | 2018                            | 4                        | Other           | 20.4            | 2018            | L3                                       | 6499                                     | 3089                                 |
| 78                             | F   | White | Former                                     | 2013                            | 2                        | SCC             | 14.6            | 2013            | L3                                       | 2177                                     | 4121                                 |
| 75                             | F   | White | Current                                    | 2013                            | 1                        | AC              | 24.0            | 2013            | L3                                       | 17475                                    | 15770                                |
| 53                             | F   | White | Former                                     | 2015                            | 1                        | AC              | 30.4            | 2015            | L3                                       | 32227                                    | 16338                                |
| 86                             | F   | White | Never                                      | 2014                            | 1                        | AC              | 26.6            | 2013            | L3                                       | 17862                                    | 18054                                |
| 64                             | F   | White | Current                                    | 2010                            | 1                        | AC              | 30.1            | 2010            | L3                                       | 27728                                    | 21154                                |
| 81                             | F   | White | Former                                     | 2014                            | 2                        | SCC             | 22.7            | 2014            | L3                                       | 11353                                    | 18428                                |
| 74                             | F   | White | Former                                     | 2009                            | 1                        | SCC             | 37.6            | 2009            | L3                                       | 29109                                    | 30475                                |
| 76                             | F   | White |                                            | 2016                            | 1                        | AC              | 20.5            | 2016            | L3                                       | 15404                                    | 7277                                 |
| 64                             | F   | White | Former                                     | 2012                            | 1                        | Other           | 36.2            | 2012            | L3                                       | 44510                                    | 17011                                |
| 82                             | M   | White | Former                                     | 2011                            | 2                        | SCC             | 22.3            | 2011            | L3                                       | 9223                                     | 18253                                |
| 82                             | F   | White | Former                                     | 2014                            | 2                        | AC              | 28.8            | 2014            | L3                                       | 29122                                    | 15059                                |
| 84                             | F   | White | Current                                    | 2015                            | 2                        | AC              | 36.1            | 2015            | L3                                       | 37962                                    | 23888                                |
| 76                             | M   | White | Former                                     | 2013                            | 4                        | Other           | 32.1            | 2013            | L3                                       | 20048                                    | 36466                                |
| 65                             | F   | White |                                            | 2017                            |                          | SCC             | 26.6            | 2017            | L3                                       | 19009                                    | 11031                                |
| 75                             | F   | White | Never                                      | 2009                            | 1                        | SCC             | 30.3            | 2009            | L3                                       | 29145                                    | 19882                                |
| 55                             | F   | White | Former                                     | 2019                            | 1                        | Other           | 39              | 2019            | L3                                       | 46300                                    | 35000                                |
| 77                             | F   | White | Former                                     | 2013                            | 2                        | AC              | 30.8            | 2013            | L3                                       | 32698                                    | 17525                                |
| 69                             | M   | White | Current                                    | 2012                            | 1                        | AC              | 26.0            | 2012            | L3                                       | 11262                                    | 21129                                |
| 76                             | F   | Black | Never                                      | 2009                            | 2                        | SCC             | 25.9            | 2009            | L3                                       | 19086                                    | 13221                                |
| 90                             | M   | White | Former                                     | 2013                            | 2                        | AC              | 22.6            | 2013            | L3                                       | 15096                                    | 17634                                |
| 67                             | M   | White | Former                                     | 2010                            | 3                        | SCC             | 37.7            | 2010            | L3                                       | 36345                                    | 48093                                |
| 84                             | M   | White | Former                                     | 2009                            | 2                        | SCC             | 26.9            | 2009            | L3                                       | 19996                                    | 16169                                |
| 73                             | F   | White | Former                                     | 2012                            | 3                        | SCC             | 39.9            | 2012            | L3                                       | 38409                                    | 37480                                |
| 75                             | M   | White |                                            | 2017                            | 4                        | AC              | 24.1            | 2018            | L3                                       | 7856                                     | 31540                                |
| 81                             | F   | White | Never                                      | 2013                            | 1                        | AC              | 34.5            | 2013            | L3                                       | 41809                                    | 28037                                |
| 72                             | F   | White | Current                                    | 2010                            | 1                        | AC              | 25.4            | 2010            | L3                                       | 16159                                    | 17343                                |
| 61                             | F   | White | Former                                     | 2013                            | 1                        | AC              | 21.1            | 2013            | L3                                       | 8524                                     | 3318                                 |
| 71                             | M   | White | Former                                     | 2016                            | 2                        | SCC             | 32.5            | 2016            | L3                                       | 36400                                    | 37800                                |
| 61                             | F   | White | Former                                     | 2013                            | 3                        | SCC             | 26.8            | 2013            | L3                                       | 26804                                    | 16024                                |
| 72                             | F   | White | Never                                      | 2010                            | 1                        | Other           | 28.9            | 2010            | L3                                       | 29361                                    | 17657                                |
| 75                             | F   | White | Former                                     | 2010                            | 3                        | AC              | 26.6            | 2010            | L3                                       | 28985                                    | 14764                                |
| 76                             | F   | White | Former                                     | 2010                            | 1                        | AC              | 29.6            | 2010            | L3                                       | 29278                                    | 18161                                |
| 63                             | F   | White | Current                                    | 2015                            | 2                        | SCC             | 19.2            | 2015            | L3                                       | 3413                                     | 2090                                 |
| 64                             | F   | White | Former                                     | 2013                            |                          | SCC             | 34.2            | 2013            | L3                                       | 12469                                    | 6687                                 |
| 55                             | F   | White | Former                                     | 2011                            | 2                        | AC              | 30.4            | 2011            | L3                                       | 34728                                    | 9385                                 |
| 73                             | M   | White | Current                                    | 2010                            | 1                        | AC              | 21.0            | 2010            | L3                                       | 7215                                     | 5108                                 |
| 71                             | M   | Black | Current                                    | 2015                            | 1                        | AC              | 27.1            | 2015            | L3                                       | 15753                                    | 17588                                |
| 70                             | F   | White | Former                                     | 2015                            | 2                        | SCC             | 20.3            | 2015            | L3                                       | 16188                                    | 7699                                 |

|    |   |       |         |      |   |       |      |      |    |       |       |
|----|---|-------|---------|------|---|-------|------|------|----|-------|-------|
| 68 | F | White | Never   | 2008 | 2 | AC    | 34.5 | 2008 | L3 | 29732 | 13808 |
| 73 | F | White | Former  | 2014 | 1 | AC    | 37.1 | 2014 | L3 | 30080 | 25125 |
| 73 | F | White | Never   | 2014 | 2 | AC    | 27.7 | 2013 | L2 | 20101 | 27357 |
| 71 | M | White | Former  | 2010 | 1 | AC    | 29.2 | 2009 | L3 | 22532 | 23640 |
| 69 | M | White | Former  | 2009 | 1 | AC    | 27.9 | 2009 | L1 | 12898 | 14739 |
| 79 | F | White | Former  | 2010 | 1 | AC    | 25.1 | 2010 | L3 | 18349 | 10667 |
| 55 | F | Black | Former  | 2013 | 1 | AC    | 28.3 | 2013 | L3 | 15736 | 11751 |
| 80 | M | White | Former  | 2015 | 3 | AC    | 27.3 | 2015 | L3 | 19784 | 31324 |
| 49 | F | White | Never   | 2009 | 2 | Other | 16.7 | 2009 | L3 | 1846  | 1567  |
| 51 | M | Black | Current | 2013 | 1 | SCC   | 21.7 | 2013 | L3 | 12525 | 5567  |
| 76 | M | White | Former  | 2012 | 1 | Other | 24.5 | 2011 | L3 | 17295 | 22263 |
| 58 | M | Other |         | 2017 | 1 | AC    | 25   | 2017 | L3 | 11255 | 9129  |
| 73 | M | Black | Former  | 2011 | 1 | SCC   | 24.5 | 2011 | L3 | 10887 | 9047  |
| 56 | F | White | Former  | 2013 | 4 | AC    | 27.1 | 2013 | L3 | 27357 | 11890 |
| 57 | F | White | Current | 2012 | 1 | AC    | 25.3 | 2012 | L3 | 25666 | 12632 |
| 57 | M | Black | Former  | 2013 | 2 | AC    | 26.5 | 2013 | L3 | 16781 | 28260 |
| 66 | F | White | Current | 2009 | 1 | AC    | 28.0 | 2009 | L3 | 29644 | 14104 |
| 66 | M | White |         | 2018 |   | AC    | 27.3 | 2018 | L3 | 17534 | 25378 |
| 56 | F | White | Former  | 2013 | 1 | SCC   | 24.2 | 2013 | L3 | 22594 | 14322 |
| 81 | F | White | Current | 2015 | 1 | AC    | 24.1 | 2015 | L3 | 5330  | 5278  |
| 71 | F | White | Former  | 2014 | 1 | AC    | 24.3 | 2014 | L3 | 18001 | 12104 |
| 72 | F | White |         | 2017 | 4 | SCC   | 35.4 | 2017 | L3 | 38699 | 22255 |
| 60 | M | White | Current | 2009 | 1 | AC    | 27.6 | 2009 | L3 | 16287 | 17004 |
| 80 | M | White |         | 2017 |   | AC    | 29.2 | 2017 | L3 | 27257 | 31210 |
| 61 | M | White |         | 2018 |   | SCC   | 36   | 2018 | L3 | 30670 | 41683 |
| 61 | F | White | Former  | 2014 | 1 | AC    | 30.1 | 2014 | L3 | 19296 | 21351 |
| 58 | F | White | Current | 2010 | 2 | AC    | 19.7 | 2010 | L3 | 10993 | 6212  |
| 78 | F | White | Current | 2014 | 1 | SCC   | 18.9 | 2014 | L3 | 6770  | 8166  |
| 63 | F | White | Former  | 2012 | 1 | AC    | 22.5 | 2012 | L3 | 14350 | 6952  |
| 82 | F | White | Never   | 2011 | 1 | AC    | 19.6 | 2011 | L3 | 13306 | 4267  |
| 75 | M | White | Never   | 2013 | 1 | AC    | 31.8 | 2013 | L3 | 24548 | 33558 |
| 69 | F | White | Former  | 2017 | 2 | Other | 36   | 2017 | L3 | 50900 | 21700 |
| 79 | F | Black | Current | 2011 | 1 | SCC   | 17.8 | 2011 | L3 | 4577  | 3736  |
| 78 | F | White |         | 2018 | 4 | Other | 34.5 | 2018 | L3 | 37145 | 19819 |
| 62 | M | White | Former  | 2014 | 2 | SCC   | 39.9 | 2014 | L3 | 40273 | 44485 |
| 76 | F | White | Never   | 2014 | 1 | AC    | 19.3 | 2014 | L3 | 2725  | 3725  |
| 65 | F | White | Former  | 2010 | 1 | Other | 25.4 | 2010 | L3 | 20029 | 23838 |
| 65 | M | White | Former  | 2012 | 2 | AC    | 35.5 | 2012 | L3 | 26336 | 57574 |
| 80 | M | Other | Former  | 2013 | 2 | AC    | 35.6 | 2012 | L3 | 25386 | 58546 |
| 70 | F | Black |         | 2018 | 4 | AC    | 35.4 | 2018 | L3 | 45180 | 13423 |
| 87 | F | White | Former  | 2015 | 1 | AC    | 27.3 | 2015 | L3 | 23423 | 20487 |
| 74 | M |       | Former  | 2015 | 1 | AC    | 28.1 | 2015 | L3 | 20134 | 34692 |
| 65 | F | Black | Former  | 2017 | 2 | AC    | 37.8 | 2016 | L3 | 39200 | 31600 |
| 74 | M | White | Never   | 2011 | 1 | AC    | 28.7 | 2011 | L3 | 19822 | 26936 |
| 76 | M | White | Former  | 2014 | 1 | AC    | 40.9 | 2014 | L3 | 16094 | 33466 |
| 40 | F | White | Never   | 2015 | 1 | AC    | 41.9 | 2015 | L3 | 45709 | 14900 |
| 69 | F | White | Current | 2012 | 2 | SCC   | 23.6 | 2012 | L3 | 20462 | 17623 |
| 81 | M | White |         | 2018 |   | AC    | 24   | 2017 | L3 | 16582 | 28647 |
| 74 | F | Black | Current | 2015 | 2 | SCC   | 23.9 | 2015 | L3 | 22522 | 9565  |
| 60 | F | Black | Current | 2009 | 1 | AC    | 25.5 | 2009 | L3 | 27354 | 9021  |
| 65 | F | White | Former  | 2012 | 1 | AC    | 35.8 | 2012 | L3 | 39962 | 20996 |

|    |   |       |         |      |   |       |      |      |    |       |       |
|----|---|-------|---------|------|---|-------|------|------|----|-------|-------|
| 78 | M | White | Former  | 2013 | 1 | SCC   | 30.8 | 2013 | L3 | 37609 | 28228 |
| 74 | F | White | Former  | 2013 | 1 | SCC   | 32.1 | 2013 | L3 | 25981 | 21456 |
| 85 | F | White | Former  | 2015 | 2 | Other | 23.1 | 2015 | L3 | 13288 | 4481  |
| 72 | F | White | Former  | 2012 | 2 | AC    | 39.0 | 2012 | L3 | 62744 | 30103 |
| 65 | M | White | Former  | 2013 | 1 | AC    | 31.8 | 2012 | L3 | 15486 | 54124 |
| 76 | F | White | Former  | 2010 | 1 | SCC   | 28.5 | 2010 | L3 | 31459 | 16027 |
| 71 | F | White | Former  | 2009 |   | Other | 33.6 | 2009 | L3 | 32913 | 21914 |
| 81 | M | Black |         | 2018 |   | SCC   | 29   | 2018 | L3 | 19765 | 27743 |
| 83 | F | White |         | 2016 |   | AC    | 26.8 | 2016 | L3 | 22411 | 30841 |
| 73 | F | White |         | 2018 | 3 | AC    | 24.5 | 2018 | L2 | 13934 | 11791 |
| 63 | M | White | Current | 2014 | 1 | SCC   | 20.8 | 2014 | L3 | 10455 | 23209 |
| 73 | F | White | Current | 2015 | 1 | AC    | 24.6 | 2015 | L3 | 18149 | 16920 |
| 80 | F | White | Former  | 2011 | 1 | AC    | 20.5 | 2011 | L3 | 8966  | 3335  |
| 71 | F | White | Current | 2015 | 1 | SCC   | 36.8 | 2015 | L3 | 43331 | 17812 |
| 76 | F | White | Former  | 2013 | 1 | SCC   | 22.3 | 2012 | L3 | 15323 | 5476  |
| 66 | F | White |         | 2017 |   | AC    | 28.5 | 2017 | L3 | 25995 | 13235 |
| 77 | F | White | Former  | 2013 | 1 | AC    | 29.1 | 2013 | L3 | 12755 | 17897 |
| 69 | F | Black |         | 2017 |   | AC    | 19.2 | 2017 | L3 | 9302  | 5573  |
| 71 | M | White | Former  | 2013 | 1 | SCC   | 36.8 | 2013 | L3 | 29377 | 31970 |
| 60 | F | Black | Former  | 2015 | 1 | SCC   | 43.6 | 2015 | L3 | 46260 | 19594 |
| 58 | F | White | Former  | 2009 | 1 | AC    | 32.1 | 2009 | L3 | 33201 | 23448 |
| 71 | M | White |         | 2017 | 4 | AC    | 22.3 | 2017 | L3 | 16007 | 10245 |
| 66 | F | White | Current | 2014 | 1 | AC    | 22.3 | 2014 | L3 | 13652 | 8285  |
| 79 | M | Black |         | 2018 |   | Other | 20   | 2018 | L3 | 7541  | 7753  |
| 61 | M | White |         | 2014 | 2 | Other | 33.1 | 2014 | L3 | 27727 | 28470 |
| 55 | F | White | Current | 2014 | 1 | AC    | 18.0 | 2014 | L3 | 11104 | 7919  |
| 63 | M | White | Former  | 2011 | 1 | AC    | 24.7 | 2011 | L3 | 23349 | 17918 |
| 73 | M | White | Current | 2013 | 2 | SCC   | 31.6 | 2013 | L3 | 27905 | 32118 |
| 56 | F | White | Current | 2010 | 1 | AC    | 22.4 | 2010 | L3 | 17609 | 8185  |
| 57 | M | White |         | 2017 |   | Other | 29   | 2017 | L3 | 13813 | 39450 |
| 68 | M | White | Current | 2013 | 3 | SCC   | 31.0 | 2013 | L3 | 24319 | 32906 |
| 85 | M | Black | Former  | 2015 | 1 | AC    | 26.9 | 2015 | L3 | 15395 | 18868 |
| 63 | F | White | Current | 2012 | 2 | AC    | 36.9 | 2012 | L3 | 38840 | 24192 |
| 76 | F | White | Never   | 2010 | 1 | AC    | 23.2 | 2010 | L3 | 6826  | 8208  |
| 66 | F | White | Never   | 2013 | 2 | AC    | 27.1 | 2013 | L3 | 18042 | 5142  |
| 46 | F | Black | Current | 2013 | 2 | AC    | 20.0 | 2013 | L3 | 11532 | 4136  |
| 70 | M | White | Former  | 2010 | 2 | Other | 31.4 | 2010 | L3 | 22885 | 28792 |
| 86 | F | White | Former  | 2009 |   | AC    | 23.4 | 2009 | L3 | 13465 | 8315  |
| 53 | F | Black | Current | 2010 | 1 | AC    | 36.9 | 2009 | L3 | 47523 | 16285 |
| 60 | M | Black | Former  | 2011 | 1 | AC    | 31.0 | 2011 | L3 | 29135 | 10110 |
| 76 | M | White | Former  | 2014 | 1 | AC    | 26.4 | 2014 | L3 | 14156 | 34732 |
| 56 | M | White | Former  | 2012 | 2 | AC    | 25.0 | 2012 | L3 | 16936 | 13542 |
| 70 | F | White |         | 2018 | 1 | AC    | 26.5 | 2018 | L3 | 29178 | 26182 |
| 74 | M | White | Former  | 2012 | 1 | AC    | 25.1 | 2012 | L3 | 15683 | 11016 |
| 64 | F | White | Former  | 2014 | 1 | SCC   | 25.3 | 2014 | L3 | 14816 | 4408  |
| 77 | M | White |         | 2018 | 4 | SCC   | 27.2 | 2018 | L3 | 21284 | 40666 |
| 74 | M | White | Former  | 2011 | 2 | Other | 28.8 | 2011 | L3 | 10966 | 58095 |
| 74 | M | White | Former  | 2010 | 2 | SCC   | 23.4 | 2010 | L3 | 11695 | 11788 |
| 72 | F | White | Former  | 2011 | 1 | AC    | 26.9 | 2011 | L3 | 21697 | 15912 |
| 61 | M | White | Current | 2008 | 1 | AC    | 35.3 | 2008 | L3 | 28731 | 41376 |
| 88 | M | White |         | 2018 | 1 | SCC   | 22.6 | 2018 | L2 | 10549 | 15489 |

|    |   |       |         |      |   |       |      |      |    |       |       |
|----|---|-------|---------|------|---|-------|------|------|----|-------|-------|
| 68 | M | White | Never   | 2011 | 2 | AC    | 28.9 | 2010 | L3 | 17922 | 24514 |
| 79 | M | White | Former  | 2010 | 1 | SCC   | 26.3 | 2010 | L3 | 14682 | 35019 |
| 70 | M | White | Former  | 2010 | 1 | SCC   | 35.1 | 2010 | L3 | 27178 | 47449 |
| 61 | M | White | Former  | 2013 | 3 | SCC   | 21.7 | 2013 | L3 | 4783  | 8838  |
| 74 | M | White | Former  | 2009 | 1 | SCC   | 35.4 | 2009 | L3 | 24226 | 22436 |
| 63 | F | White | Former  | 2012 | 1 | AC    | 25.6 | 2012 | L3 | 23477 | 19015 |
| 63 | M | White | Former  | 2011 | 1 | SCC   | 26.6 | 2010 | L3 | 9673  | 21845 |
| 53 | M | White | Former  | 2011 | 1 | AC    | 19.5 | 2011 | L3 | 14879 | 24519 |
| 56 | M | White | Former  | 2013 | 1 | SCC   | 28.0 | 2013 | L3 | 26485 | 14903 |
| 64 | F | White | Current | 2019 | 1 | AC    | 22.2 | 2019 | L3 | 12600 | 17000 |
| 59 | F | White | Former  | 2011 | 1 | AC    | 29.8 | 2011 | L3 | 21100 | 5799  |
| 66 | M | White |         | 2018 | 1 | SCC   | 24.5 | 2018 | L3 | 14493 | 21392 |
| 74 | M | White | Current | 2015 | 1 | AC    | 21.9 | 2015 | L3 | 13856 | 17619 |
| 46 | M | White | Current | 2008 |   | AC    | 22.7 | 2008 | L3 | 7186  | 11461 |
| 74 | F | White | Never   | 2008 |   | AC    | 28.0 | 2008 | L1 | 13896 | 18201 |
| 56 | F | White | Never   | 2009 | 1 | AC    | 20.4 | 2009 | L3 | 19116 | 6386  |
| 85 | F | White |         | 2008 | 1 | AC    | 23.2 | 2008 | L3 | 13302 | 6939  |
| 83 | F | White | Never   | 2008 | 1 | AC    | 25.0 | 2008 | L3 | 15250 | 7560  |
| 81 | F | White | Current | 2009 |   | SCC   | 27.1 | 2009 | L3 | 18416 | 13686 |
| 32 | F | White | Former  | 2009 |   | Other | 32.8 | 2008 | L3 | 33169 | 10441 |
| 51 | F | White | Former  | 2008 | 2 | AC    | 22.0 | 2008 | L3 | 16301 | 9655  |
| 64 | F | White | Former  | 2008 | 1 | AC    | 30.5 | 2008 | L3 | 45510 | 21447 |
| 33 | F | White | Never   | 2008 |   | Other | 21.0 | 2008 | L3 | 15469 | 5939  |
| 55 | F | White | Current | 2008 |   | AC    | 26.7 | 2008 | L3 | 24745 | 12743 |
| 71 | M | Black | Former  | 2009 | 3 | AC    | 20.1 | 2009 | L3 | 10322 | 8466  |
| 66 | M | White | Former  | 2010 | 1 | AC    | 21.2 | 2009 | L3 | 16593 | 16163 |
| 81 | F | White | Current | 2009 | 1 | SCC   | 17.5 | 2008 | L3 | 3337  | 4912  |
| 75 | M | White | Former  | 2013 | 1 | AC    | 27.0 | 2013 | L3 | 17314 | 25013 |
| 45 | F | White | Former  | 2009 |   | Other | 36.0 | 2009 | L3 | 41999 | 19749 |
| 71 | M | White | Current | 2019 |   | SCC   | 30.3 | 2019 | L3 | 24300 | 34500 |
| 60 | F | White | Former  | 2008 | 1 | AC    | 41.1 | 2008 | L3 | 54848 | 44320 |
| 79 | F | White | Never   | 2008 | 1 | AC    | 29.8 | 2008 | L3 | 20611 | 20505 |
| 74 | M | White | Never   | 2009 | 1 | AC    | 22.4 | 2009 | L3 | 6876  | 6771  |
| 84 | M | White | Former  | 2009 | 1 | SCC   | 28.6 | 2008 | L3 | 15037 | 36727 |
| 66 | F | White | Former  | 2009 | 1 | AC    | 38.6 | 2009 | L3 | 48810 | 29023 |
| 64 | F | White | Former  | 2009 | 4 | AC    | 38.8 | 2008 | L3 | 34804 | 31498 |
| 49 | F | White | Former  | 2009 | 1 | AC    | 35.5 | 2008 | L3 | 47419 | 19285 |
| 52 | F | White | Former  | 2009 | 4 | AC    | 19.8 | 2008 | L3 | 7997  | 7758  |
| 75 | F | White | Former  | 2009 | 1 | AC    | 24.4 | 2009 | L3 | 13359 | 13453 |
| 74 | M | White | Former  | 2009 | 1 | SCC   | 32.3 | 2008 | L1 | 9892  | 38217 |
| 53 | M | Black | Former  | 2009 | 1 | SCC   | 30.8 | 2009 | L3 | 35040 | 24292 |
| 64 | M | White | Former  | 2009 | 1 | AC    | 35.2 | 2009 | L3 | 29682 | 32926 |
| 68 | M | White | Former  | 2009 | 1 | AC    | 30.5 | 2009 | L3 | 28971 | 21085 |
| 69 | F | White | Former  | 2009 | 1 | SCC   | 26.7 | 2009 | L3 | 23413 | 11447 |
| 68 | F | White | Former  | 2009 | 1 | AC    | 34.6 | 2009 | L1 | 21811 | 18572 |
| 81 | F | White | Former  | 2009 | 1 | SCC   | 33.3 | 2008 | L3 | 34729 | 24097 |
| 82 | F | Black | Former  | 2009 | 1 | SCC   | 27.4 | 2009 | L3 | 27989 | 7537  |
| 66 | M | White | Former  | 2009 | 1 | AC    | 28.4 | 2009 | L3 | 20068 | 19701 |
| 68 | M | White | Never   | 2012 | 2 | AC    | 28.0 | 2012 | L3 | 17864 | 14381 |
| 59 | M | White | Former  | 2009 | 2 | SCC   | 20.7 | 2009 | L1 | 6047  | 8076  |
| 62 | F | White | Former  | 2012 | 1 | AC    | 25.4 | 2012 | L3 | 20754 | 7334  |

|    |   |       |         |      |   |       |      |      |    |       |       |
|----|---|-------|---------|------|---|-------|------|------|----|-------|-------|
| 68 | F | White | Former  | 2009 | 1 | AC    | 25.6 | 2009 | L3 | 15437 | 15505 |
| 70 | M | White | Former  | 2009 | 3 | SCC   | 28.2 | 2009 | L3 | 9416  | 42736 |
| 52 | F | White | Current | 2009 | 1 | SCC   | 23.1 | 2009 | L3 | 16355 | 7758  |
| 66 | M | White | Former  | 2009 | 3 | AC    | 38.1 | 2009 | L3 | 36043 | 46951 |
| 56 | F | White | Former  | 2015 | 1 | AC    | 21.1 | 2014 | L3 | 6521  | 4420  |
| 74 | M | White | Former  | 2009 | 1 | AC    | 26.2 | 2009 | L3 | 14366 | 32938 |
| 66 | F | Other | Former  | 2009 | 2 | AC    | 34.6 | 2009 | L3 | 39393 | 27935 |
| 54 | M | White | Current | 2009 | 3 | SCC   | 22.3 | 2009 | L3 | 5217  | 4763  |
| 80 | M | White | Former  | 2009 | 2 | Other | 28.3 | 2009 | L3 | 29136 | 27311 |
| 62 | F | White | Current | 2009 | 1 | AC    | 26.1 | 2009 | L3 | 29529 | 9035  |
| 84 | M | White | Former  | 2009 | 2 | SCC   | 25.8 | 2009 | L3 | 11828 | 23581 |
| 62 | F | White | Former  | 2009 | 1 | AC    | 19.1 | 2009 | L3 | 8638  | 4449  |
| 74 | F | White | Former  | 2009 | 1 | AC    | 19.7 | 2009 | L3 | 5010  | 3622  |
| 82 | F | White | Former  | 2009 | 1 | AC    | 24.7 | 2009 | L3 | 16095 | 10035 |
| 81 | F | White | Former  | 2009 | 1 | SCC   | 25.2 | 2009 | L3 | 17575 | 11121 |
| 77 | F | White | Current | 2009 | 1 | SCC   | 23.8 | 2009 | L3 | 18567 | 5401  |
| 58 | F | White | Former  | 2009 | 1 | Other | 22.4 | 2009 | L3 | 10811 | 8553  |
| 86 | F | White | Former  | 2009 | 3 | SCC   | 25.7 | 2009 | L3 | 12998 | 14375 |
| 51 | M | White | Current | 2009 | 2 | AC    | 21.5 | 2009 | L3 | 9435  | 7376  |
| 69 | M | White | Former  | 2015 | 2 | AC    | 32.2 | 2015 | L3 | 30010 | 30226 |
| 82 | F | White | Current | 2009 | 1 | SCC   | 16.7 | 2009 | L3 | 2962  | 4889  |
| 52 | F | White | Current | 2014 | 1 | AC    | 23.5 | 2014 | L3 | 26440 | 18812 |
| 66 | F | White | Former  | 2009 | 1 | AC    | 23.1 | 2009 | L3 | 15815 | 9001  |
| 76 | F | White | Former  | 2011 | 3 | SCC   | 25.8 | 2011 | L2 | 19506 | 5008  |
| 68 | M | Asian | Never   | 2014 | 2 | AC    | 27.1 | 2014 | L3 | 19030 | 29406 |
| 25 | F | White |         | 2009 | 1 | Other | 20.9 | 2009 | L3 | 6162  | 2381  |
| 78 | F | White | Former  | 2012 | 1 | SCC   | 28.1 | 2012 | L3 | 16202 | 13813 |
| 74 | F | White | Former  | 2010 | 3 | AC    | 32.3 | 2010 | L2 | 20739 | 34422 |
| 59 | F | White | Current | 2010 | 1 | AC    | 20.3 | 2009 | L3 | 6681  | 2350  |
| 73 | M | White | Former  | 2010 | 1 | SCC   | 17.6 | 2009 | L3 | 3831  | 3258  |
| 73 | F | White | Former  | 2015 | 1 | SCC   | 27.0 | 2015 | L3 | 16562 | 12533 |
| 79 | F | White | Never   | 2009 |   | Other | 25.0 | 2009 | L3 | 21951 | 19993 |
| 77 | M | White | Former  | 2010 | 1 | AC    | 25.1 | 2009 | L3 | 13237 | 19483 |
| 79 | M | White | Current | 2010 | 1 | SCC   | 25.5 | 2010 | L3 | 16337 | 24121 |
| 70 | F | White | Former  | 2010 | 1 | AC    | 53.0 |      | L3 | 16697 | 7548  |
| 49 | M | White | Current | 2010 | 2 | SCC   | 32.8 | 2009 | L3 | 15702 | 24728 |
| 74 | M | White | Former  | 2010 |   | Other | 31.6 | 2010 | L3 | 25598 | 34110 |
| 75 | M | White | Current | 2013 | 1 | AC    | 29.4 | 2013 | L3 | 14967 | 27415 |
| 79 | M | White | Former  | 2010 | 2 | AC    | 39.5 | 2010 | L3 | 26068 | 42003 |
| 55 | M | White | Current | 2010 | 1 | SCC   | 27.8 | 2010 | L3 | 11649 | 31176 |
| 74 | M | White | Former  | 2010 | 1 | AC    | 22.9 | 2010 | L3 | 11655 | 5637  |
| 73 | F | White | Former  | 2010 | 2 | AC    | 25.2 | 2010 | L3 | 12646 | 16429 |
| 80 | M | White | Former  | 2010 | 2 | SCC   | 25.9 | 2010 | L2 | 9985  | 23148 |
| 71 | F | White | Current | 2012 | 1 | SCC   | 22.0 | 2012 | L3 | 9100  | 12677 |
| 76 | F | White | Never   | 2010 | 2 | AC    | 21.4 | 2010 | L3 | 12173 | 10197 |
| 74 | F | White | Former  | 2011 | 1 | SCC   | 32.3 | 2011 | L3 | 38259 | 19004 |
| 62 | F | White | Never   | 2010 | 1 | AC    | 56.2 | 2009 | L3 | 65366 | 36816 |
| 62 | M | White | Former  | 2010 | 1 | AC    | 24.1 | 2010 | L3 | 14681 | 21188 |
| 59 | M | White | Current | 2010 | 3 | Other | 21.0 | 2010 | L2 | 7139  | 5120  |
| 81 | F | White | Former  | 2011 | 1 | AC    | 25.1 | 2011 | L3 | 13888 | 14891 |
| 62 | F | White | Former  | 2010 | 1 | SCC   | 21.3 | 2010 | L3 | 20074 | 19919 |

|    |   |       |         |      |   |       |      |      |    |       |       |
|----|---|-------|---------|------|---|-------|------|------|----|-------|-------|
| 63 | F | White | Former  | 2010 | 1 | AC    | 29.6 | 2010 | L3 | 22979 | 17530 |
| 60 | F | White | Current | 2010 | 1 | SCC   | 36.1 | 2010 | L3 | 40659 | 20975 |
| 70 | F | White | Current | 2010 | 1 | SCC   | 24.4 | 2010 | L3 | 9055  | 7846  |
| 60 | M | White | Former  | 2010 | 2 | SCC   | 21.9 | 2010 | L3 | 4949  | 5443  |
| 58 | F | White | Current | 2010 | 2 | AC    | 27.9 | 2010 | L3 | 36374 | 14081 |
| 70 | M | White | Current | 2010 | 1 | SCC   | 23.3 | 2010 | L3 | 10578 | 14875 |
| 78 | F | White | Current | 2010 | 1 | AC    | 29.2 | 2010 | L3 | 27432 | 16509 |
| 69 | M | White |         | 2017 | 1 | AC    | 32.7 | 2017 | L3 | 36693 | 17351 |
| 63 | M | White | Former  | 2014 | 1 | AC    | 29.1 | 2014 | L3 | 21200 | 34115 |
| 54 | M | White | Current | 2010 | 3 | SCC   | 21.7 | 2010 | L2 | 9791  | 16444 |
| 73 | F | White | Former  | 2010 | 1 | SCC   | 28.8 | 2010 | L3 | 22947 | 27239 |
| 45 | F | White | Current | 2010 | 1 | AC    | 19.6 | 2010 | L3 | 4619  | 5216  |
| 57 | M | White | Current | 2015 | 1 | AC    | 29.8 | 2015 | L3 | 18835 | 31683 |
| 51 | M | White | Current | 2010 | 2 | Other | 33.9 | 2010 | L3 | 32152 | 24911 |
| 40 | F | White | Former  | 2010 | 3 | AC    | 31.7 | 2010 | L3 | 25577 | 7793  |
| 59 | M | White | Current | 2015 | 1 | AC    | 24.2 | 2015 | L3 | 18638 | 11321 |
| 58 | M | Black | Current | 2012 | 1 | AC    | 28.2 | 2012 | L3 | 21346 | 17398 |
| 74 | F | Black | Former  | 2011 | 1 | AC    | 26.3 | 2011 | L2 | 13558 | 13378 |
| 78 | F | White | Former  | 2011 | 1 | AC    | 32.4 | 2011 | L3 | 24626 | 21514 |
| 65 | F | White | Former  | 2011 | 1 | AC    | 22.4 | 2011 | L3 | 6731  | 5522  |
| 59 | M | White | Former  | 2011 | 1 | AC    | 24.5 | 2011 | L3 | 11732 | 24096 |
| 81 | M | White | Former  | 2012 | 1 | Other | 28.8 | 2011 | L3 | 21909 | 33497 |
| 69 | F | White | Former  | 2011 | 2 | AC    | 34.0 | 2011 | L3 | 27616 | 28045 |
| 75 | M | White |         | 2018 | 4 | AC    | 31.2 | 2018 | L3 | 17651 | 30423 |
| 53 | M | White | Former  | 2014 | 2 | AC    | 21.0 | 2014 | L3 | 10639 | 13541 |
| 53 | F | Black | Current | 2012 | 1 | AC    | 24.0 | 2012 | L3 | 14779 | 4286  |
| 43 | F | White | Current | 2010 | 1 | AC    | 17.9 | 2010 | L3 | 10950 | 3711  |
| 72 | F | White | Former  | 2010 | 1 | AC    | 26.2 | 2010 | L3 | 21154 | 8249  |
| 67 | M | White | Current | 2010 | 1 | AC    | 23.3 | 2010 | L3 | 17058 | 11388 |
| 55 | F | White | Former  | 2011 | 1 | AC    | 35.8 | 2011 | L3 | 40216 | 12173 |
| 61 | F | White | Former  | 2010 | 2 | AC    | 31.1 | 2010 | L3 | 36329 | 13778 |
| 78 | F | White | Former  | 2010 | 2 | SCC   | 23.7 | 2010 | L3 | 17270 | 13949 |
| 71 | M | White | Current | 2010 | 1 | SCC   | 27.1 | 2010 | L3 | 23137 | 19539 |
| 57 | M | White | Former  | 2010 | 1 | AC    | 23.9 | 2010 | L3 | 6358  | 4980  |
| 49 | F | White | Current | 2010 | 2 | AC    | 28.6 | 2010 | L3 | 34542 | 9778  |
| 50 | F | White | Current | 2014 | 3 | SCC   | 19.5 | 2014 | L3 | 13819 | 4071  |
| 81 | F | White | Never   | 2010 | 1 | AC    | 43.4 | 2010 | L3 | 43666 | 16962 |
| 70 | F | White | Current | 2010 | 2 | AC    | 25.7 | 2010 | L3 | 19579 | 7877  |
| 67 | M | White | Former  | 2010 | 1 | SCC   | 28.5 | 2010 | L3 | 18929 | 33309 |
| 61 | F | White | Current | 2010 | 1 | SCC   | 29.7 | 2010 | L3 | 24529 | 5640  |
| 72 | F | Black | Current | 2010 | 1 | AC    | 17.9 | 2010 | L3 | 6642  | 2685  |
| 71 | F | White | Former  | 2010 | 1 | SCC   | 26.7 | 2010 | L3 | 24891 | 29540 |
| 74 | M | White | Former  | 2010 | 1 | SCC   | 28.2 | 2010 | L3 | 17820 | 18341 |
| 62 | M | White | Current | 2010 | 3 | SCC   | 30.6 | 2010 | L3 | 20496 | 21723 |
| 68 | F | White |         | 2018 | 4 | AC    | 28.2 | 2018 | L3 | 23692 | 16770 |
| 60 | M | White | Never   | 2010 | 2 | AC    | 29.5 | 2010 | L3 | 19213 | 40439 |
| 63 | F | White | Former  | 2010 | 3 | Other | 40.4 | 2010 | L3 | 39201 | 32576 |
| 53 | F | Black | Current | 2010 | 1 | SCC   | 22.8 | 2010 | L3 | 13273 | 4967  |
| 81 | M | White | Former  | 2010 | 1 | SCC   | 26.2 | 2010 | L3 | 11880 | 26454 |
| 70 | M | White | Former  | 2011 | 1 | Other | 25.7 | 2011 | L3 | 11382 | 24535 |
| 57 | F | Other | Never   | 2010 | 2 | Other | 18.7 | 2011 | L3 | 9312  | 2342  |

|    |   |       |         |      |   |       |      |      |    |       |       |
|----|---|-------|---------|------|---|-------|------|------|----|-------|-------|
| 79 | F | Black | Former  | 2013 | 1 | SCC   | 27.1 | 2013 | L3 | 20288 | 7625  |
| 58 | F | White | Former  | 2010 | 1 | AC    | 27.4 | 2010 | L3 | 27923 | 13998 |
| 48 | M | White | Current | 2010 | 2 | AC    | 22.3 | 2010 | L3 | 12083 | 8750  |
| 71 | M | White | Never   | 2010 | 1 | AC    | 26.1 | 2010 | L3 | 14874 | 18367 |
| 73 | F | White | Former  | 2011 | 3 | AC    | 30.5 | 2011 | L3 | 38013 | 31169 |
| 76 | F | Black |         | 2017 |   | AC    | 24.8 | 2017 | L3 | 17671 | 4644  |
| 66 | M | White | Former  | 2013 | 1 | AC    | 30.7 | 2013 | L3 | 27640 | 16298 |
| 51 | F | White | Current | 2010 | 1 | AC    | 37.7 | 2010 | L3 | 41331 | 35872 |
| 53 | F | Black | Never   | 2011 | 1 | AC    | 25.2 | 2011 | L3 | 24575 | 7382  |
| 87 | M | White | Former  | 2011 | 1 | AC    | 24.6 | 2010 | L3 | 15821 | 27228 |
| 43 | M | White | Current | 2011 | 2 | SCC   | 27.5 | 2010 | L3 | 15750 | 18524 |
| 71 | M | White | Former  | 2011 | 1 | AC    | 25.6 | 2010 | L3 | 14996 | 22986 |
| 67 | M | White | Former  | 2010 | 1 | AC    | 19.6 | 2010 | L3 | 8660  | 2745  |
| 72 | F | White | Former  | 2010 | 2 | SCC   | 38.5 | 2010 | L3 | 59025 | 19228 |
| 73 | F | White | Former  | 2011 | 3 | AC    | 22.4 | 2010 | L3 | 17586 | 7847  |
| 63 | M | White | Former  | 2011 | 1 | AC    | 25.3 | 2011 | L3 | 13172 | 21056 |
| 57 | F | Asian | Never   | 2011 | 1 | AC    | 19.8 | 2011 | L3 | 14516 | 5484  |
| 74 | M | White | Former  | 2011 | 1 | AC    | 37.3 | 2010 | L3 | 28080 | 45978 |
| 62 | M | White | Former  | 2011 | 1 | AC    | 29.5 | 2010 | L3 | 19309 | 17975 |
| 74 | F | White |         | 2017 | 1 | AC    | 28.4 | 2017 | L3 | 20676 | 16512 |
| 68 | F | White | Former  | 2011 | 3 | AC    | 38.7 | 2011 | L3 | 50422 | 13671 |
| 45 | M | White | Former  | 2011 | 2 | SCC   | 34.2 | 2011 | L3 | 24850 | 25194 |
| 65 | M | White | Former  | 2011 | 1 | AC    | 25.8 | 2011 | L3 | 12668 | 20823 |
| 65 | M | White | Former  | 2011 | 2 | AC    | 38.1 | 2011 | L3 | 43396 | 34523 |
| 62 | F | White | Current | 2011 | 1 | AC    | 30.2 | 2011 | L3 | 20652 | 22990 |
| 76 | M | White |         | 2018 | 2 | SCC   | 33   | 2018 | L3 | 24550 | 42997 |
| 52 | F | White | Former  | 2011 | 1 | AC    | 17.8 | 2011 | L3 | 3832  | 5268  |
| 64 | F | White | Former  | 2011 | 1 | AC    | 23.1 | 2011 | L3 | 12071 | 13104 |
| 52 | M | Black | Former  | 2011 | 3 | AC    | 23.1 | 2011 | L3 | 12468 | 9526  |
| 58 | M | White | Current | 2011 | 1 | AC    | 25.0 | 2011 | L3 | 12454 | 23465 |
| 65 | M | White | Former  | 2011 | 1 | AC    | 20.1 | 2011 | L3 | 4662  | 8221  |
| 68 | F | White | Current | 2011 | 1 | AC    | 17.4 | 2011 | L3 | 4650  | 1865  |
| 75 | F | White | Former  | 2011 | 1 | AC    | 40.2 | 2011 | L3 | 50509 | 19403 |
| 55 | F | White | Former  | 2011 | 2 | AC    | 27.8 | 2011 | L3 | 22489 | 5496  |
| 69 | M | White | Former  | 2011 | 2 | SCC   | 30.0 | 2011 | L3 | 32470 | 23941 |
| 61 | F | White | Former  | 2011 | 2 | Other | 24.9 | 2011 | L3 | 19046 | 9884  |
| 72 | F | White | Former  | 2011 | 2 | AC    | 28.3 | 2011 | L3 | 25340 | 20587 |
| 49 | F | Black | Current | 2013 |   | AC    | 27.2 | 2013 | L3 | 30167 | 14544 |
| 61 | M | White | Former  | 2011 | 2 | AC    | 26.8 | 2011 | L3 | 11271 | 30428 |
| 64 | F | White | Current | 2011 | 2 | AC    | 25.1 | 2011 | L3 | 16694 | 6848  |
| 60 | F | White | Current | 2011 | 3 | Other | 18.1 | 2011 | L2 | 8045  | 6028  |
| 50 | F | White | Current | 2011 | 2 | AC    | 19.6 | 2011 | L3 | 10825 | 9258  |
| 74 | F | White | Former  | 2011 | 1 | SCC   | 40.3 | 2011 | L3 | 33215 | 18760 |
| 67 | M | White | Former  | 2011 | 1 | SCC   | 38.2 | 2011 | L3 | 51210 | 24333 |
| 54 | F | Black | Never   | 2011 | 2 | AC    | 35.8 | 2011 | L3 | 36263 | 13319 |
| 75 | M | White | Former  | 2011 | 1 | Other | 37.7 | 2011 | L3 | 30100 | 45275 |
| 60 | F | Black | Former  | 2011 | 1 | AC    | 15.8 | 2011 | L3 | 6248  | 5240  |
| 55 | F | White | Current | 2011 | 3 | AC    | 32.4 | 2011 | L3 | 31354 | 9674  |
| 34 | F | White | Former  | 2011 | 1 | AC    | 39.4 | 2011 | L3 | 62388 | 12091 |
| 72 | F | White |         | 2018 |   | Other | 19.1 | 2018 | L3 | 2128  | 3238  |
| 76 | F | White | Former  | 2012 | 1 | SCC   | 19.2 | 2011 | L3 | 9631  | 10175 |



|    |   |       |         |      |   |       |      |      |    |       |       |
|----|---|-------|---------|------|---|-------|------|------|----|-------|-------|
| 59 | F | White | Current | 2012 | 1 | AC    | 23.5 | 2011 | L3 | 19237 | 8566  |
| 58 | F | White | Former  | 2011 | 1 | SCC   | 29.3 | 2011 | L3 | 35434 | 16126 |
| 61 | F | White | Never   | 2011 | 1 | AC    | 18.7 | 2011 | L1 | 5232  | 6199  |
| 73 | F | White | Former  | 2011 | 1 | AC    | 36.2 | 2011 | L3 | 37972 | 35934 |
| 77 | F | White | Former  | 2011 | 1 | AC    | 36.6 | 2011 | L3 | 40206 | 36770 |
| 77 | F | Asian | Former  | 2011 | 3 | AC    | 18.4 | 2011 | L3 | 7441  | 3512  |
| 68 | F | White | Former  | 2011 |   | AC    | 31.4 | 2011 | L3 | 27771 | 7901  |
| 40 | F | White | Former  | 2011 | 1 | AC    | 28.9 | 2011 | L3 | 34039 | 6481  |
| 56 | F | White | Former  | 2011 | 1 | AC    | 26.0 | 2011 | L3 | 12325 | 3224  |
| 58 | F | White | Former  | 2011 | 1 | AC    | 30.7 | 2011 | L3 | 30795 | 14476 |
| 74 | M | White | Former  | 2011 | 2 | AC    | 19.5 | 2011 | L3 | 6237  | 9524  |
| 55 | M | White | Former  | 2012 | 2 | AC    | 24.6 | 2011 | L3 | 11657 | 18055 |
| 68 | F | White | Former  | 2011 | 1 | AC    | 39.8 | 2011 | L3 | 36693 | 27625 |
| 63 | F | White | Former  | 2011 | 2 | Other | 27.4 | 2011 | L3 | 13665 | 29177 |
| 65 | M | White | Former  | 2011 | 3 | AC    | 26.4 | 2011 | L3 | 14384 | 18757 |
| 63 | F | White |         | 2018 | 2 | Other | 23.6 | 2018 | L3 | 12715 | 12532 |
| 65 | M | White | Former  | 2011 | 2 | SCC   | 19.2 | 2011 | L3 | 10007 | 9780  |
| 75 | M | White | Former  | 2011 | 3 | AC    | 29.2 | 2011 | L3 | 10763 | 32217 |
| 71 | F | White | Former  | 2012 | 2 | AC    | 37.0 | 2011 | L3 | 47358 | 28275 |
| 79 | M | Black | Former  | 2011 | 1 | SCC   | 27.1 | 2011 | L3 | 20588 | 31021 |
| 81 | M | White | Current | 2011 | 1 | SCC   | 22.8 | 2011 | L3 | 6577  | 15682 |
| 80 | F | White | Never   | 2011 | 3 | AC    | 34.4 | 2011 | L3 | 27176 | 36160 |
| 77 | F | White | Former  | 2011 | 3 | AC    | 22.9 | 2011 | L3 | 21091 | 12195 |
| 55 | M | White | Former  | 2011 | 2 | AC    | 24.5 | 2011 | L3 | 13933 | 16185 |
| 52 | F | White | Former  | 2011 | 4 | AC    | 25.3 | 2011 | L3 | 24729 | 11706 |
| 62 | F | White | Former  | 2011 | 1 | AC    | 32.6 | 2011 | L3 | 18287 | 21031 |
| 59 | M | White | Former  | 2013 | 1 | SCC   | 27.9 | 2013 | L3 | 13988 | 26890 |
| 66 | F | White | Never   | 2014 | 1 | Other | 23.5 | 2014 | L3 | 16260 | 17643 |
| 88 | F | White | Former  | 2012 | 1 | SCC   | 20.9 | 2011 | L3 | 13215 | 14934 |
| 55 | M | White | Former  | 2012 | 1 | SCC   | 29.7 | 2011 | L3 | 19217 | 26587 |
| 77 | M | White | Former  | 2012 | 2 | SCC   | 28.4 | 2012 | L3 | 16564 | 32816 |
| 66 | M | White | Never   | 2012 | 1 | AC    | 25.0 | 2012 | L3 | 20163 | 18248 |
| 68 | M | White | Former  | 2012 | 1 | AC    | 24.1 | 2011 | L3 | 15370 | 9878  |
| 83 | M | White | Former  | 2012 | 2 | AC    | 27.0 | 2012 | L3 | 18825 | 33782 |
| 72 | F | White | Former  | 2014 | 1 | SCC   | 22.7 | 2014 | L3 | 14482 | 7494  |
| 79 | F | White | Former  | 2012 | 1 | AC    | 35.1 | 2012 | L3 | 41537 | 36987 |
| 65 | F | White | Former  | 2012 | 1 | SCC   | 25.9 | 2012 | L3 | 22647 | 9075  |
| 74 | F | White | Never   | 2012 | 1 | AC    | 20.4 | 2012 | L3 | 12762 | 3286  |
| 50 | F | White | Former  | 2012 | 1 | Other | 26.6 | 2012 | L3 | 26001 | 28255 |
| 74 | M | Black | Former  | 2012 | 1 | AC    | 32.0 | 2012 | L3 | 16685 | 47135 |
| 81 | M | White | Former  | 2014 | 2 | SCC   | 24.8 | 2014 | L3 | 21903 | 26113 |
| 70 | M | White | Current | 2012 | 1 | SCC   | 25.4 | 2012 | L3 | 16399 | 12051 |
| 68 | M | Black | Former  | 2012 | 3 | SCC   | 28.2 | 2012 | L3 | 18236 | 16523 |
| 84 | F | White | Current | 2012 | 1 | AC    | 25.7 | 2012 | L3 | 12326 | 11373 |
| 79 | M | White | Former  | 2012 | 1 | AC    | 26.9 | 2012 | L3 | 14600 | 24248 |
| 59 | F | White | Former  | 2012 | 1 | AC    | 23.1 | 2012 | L3 | 18569 | 7377  |
| 49 | F | White | Current | 2012 | 1 | AC    | 21.3 | 2012 | L3 | 7781  | 1604  |
| 61 | F | White | Former  | 2012 | 1 | AC    | 26.2 | 2012 | L3 | 17109 | 14215 |
| 49 | F | White | Former  | 2012 | 2 | SCC   | 29.2 | 2012 | L3 | 21726 | 16151 |
| 65 | M | White | Current | 2012 | 2 | AC    | 30.7 | 2012 | L3 | 33086 | 29488 |
| 77 | F | White | Former  | 2012 | 2 | AC    | 34.6 | 2012 | L3 | 27795 | 36308 |

|    |   |       |         |      |   |       |      |      |    |       |       |
|----|---|-------|---------|------|---|-------|------|------|----|-------|-------|
| 64 | F | White | Former  | 2012 | 1 | SCC   | 20.4 | 2012 | L3 | 6726  | 4481  |
| 56 | F | White | Former  | 2012 |   | SCC   | 34.8 | 2012 | L3 | 28424 | 17962 |
| 60 | F | White | Current | 2012 | 1 | SCC   | 27.2 | 2012 | L3 | 25606 | 13334 |
| 73 | F | White | Former  | 2012 | 1 | SCC   | 21.1 | 2012 | L3 | 17542 | 9128  |
| 68 | F | White | Former  | 2012 | 1 | AC    | 27.5 | 2012 | L3 | 27344 | 19942 |
| 61 | F | White | Former  | 2013 | 1 | AC    | 28.2 | 2013 | L3 | 12047 | 18385 |
| 69 | F | White | Former  | 2012 | 1 | AC    | 34.2 | 2012 | L3 | 31714 | 18149 |
| 58 | F | White | Former  | 2012 | 1 | AC    | 24.4 | 2012 | L3 | 12159 | 9537  |
| 65 | F | White | Never   | 2012 | 1 | AC    | 29.9 | 2012 | L3 | 22230 | 20538 |
| 53 | F | White | Never   | 2012 | 1 | Other | 36.9 | 2012 | L3 | 28124 | 25667 |
| 69 | F | White | Former  | 2014 | 1 | AC    | 17.1 | 2014 | L3 | 6308  | 3513  |
| 63 | F | White | Current | 2012 | 1 | AC    | 16.3 | 2012 | L3 | 6240  | 9087  |
| 64 | M | White | Former  | 2012 | 2 | SCC   | 29.6 | 2012 | L3 | 22913 | 42249 |
| 64 | F | White | Former  | 2012 | 2 | Other | 24.9 | 2012 | L3 | 24385 | 10584 |
| 68 | M | Black | Former  | 2013 | 1 | AC    | 23.4 | 2013 | L3 | 12995 | 8991  |
| 44 | F | Asian | Former  | 2012 | 3 | AC    | 23.2 | 2012 | L3 | 13480 | 8418  |
| 52 | F | White | Former  | 2012 | 1 | AC    | 19.2 | 2012 | L3 | 7465  | 4921  |
| 68 | M | White | Former  | 2012 | 1 | SCC   | 29.5 | 2012 | L3 | 24832 | 32207 |
| 75 | F | White | Former  | 2012 | 1 | AC    | 23.5 | 2012 | L3 | 24378 | 10779 |
| 66 | M | White | Former  | 2012 | 1 | AC    | 28.5 | 2012 | L3 | 17932 | 18653 |
| 67 | M | Black | Former  | 2012 | 1 | AC    | 33.2 | 2012 | L3 | 37118 | 33708 |
| 67 | F | White | Former  | 2012 | 1 | AC    | 25.0 | 2012 | L3 | 19366 | 8238  |
| 69 | F | White | Former  | 2012 |   | Other | 22.4 | 2012 | L3 | 15615 | 13287 |
| 51 | M | White | Former  | 2012 | 1 | Other | 25.6 | 2012 | L3 | 17044 | 14222 |
| 53 | M | White | Former  | 2012 | 1 | AC    | 27.4 | 2012 | L3 | 14168 | 24877 |
| 71 | F | White | Former  | 2012 | 1 | AC    | 30.9 | 2012 | L3 | 31588 | 26379 |
| 68 | F | White | Former  | 2012 | 3 | AC    | 36.9 | 2012 | L3 | 48332 | 10816 |
| 77 | M | White | Former  | 2012 | 1 | AC    | 35.5 | 2012 | L3 | 26396 | 31049 |
| 74 | M | White | Never   | 2012 | 1 | AC    | 29.5 | 2012 | L3 | 25786 | 35278 |
| 66 | F | White | Former  | 2012 | 1 | AC    | 24.5 | 2012 | L3 | 24022 | 10347 |
| 68 | F | White | Former  | 2012 | 2 | AC    | 22.3 | 2012 | L3 | 11538 | 8565  |
| 51 | F | White | Former  | 2012 | 1 | AC    | 44.1 | 2012 | L3 | 49424 | 17548 |
| 73 | F | White | Current | 2012 | 2 | AC    | 22.0 | 2012 | L3 | 15221 | 9317  |
| 72 | M | Asian | Former  | 2014 | 2 | AC    | 24.5 | 2014 | L3 | 12993 | 14819 |
| 63 | F | White | Former  | 2012 | 2 | SCC   | 28.5 | 2012 | L3 | 22351 | 23610 |
| 61 | F | White | Current | 2012 | 1 | SCC   | 28.6 | 2012 | L3 | 18324 | 20408 |
| 70 | M | White | Former  | 2012 | 1 | SCC   | 26.7 | 2012 | L3 | 20960 | 22900 |
| 67 | M | White | Never   | 2012 | 2 | AC    | 28.3 | 2012 | L3 | 22623 | 27425 |
| 57 | M | White | Former  | 2012 | 2 | Other | 22.0 | 2012 | L3 | 8319  | 7062  |
| 54 | M | Black | Current | 2012 | 1 | AC    | 30.7 | 2012 | L3 | 23014 | 17046 |
| 65 | F | White | Never   | 2012 | 1 | AC    | 25.4 | 2012 | L3 | 21138 | 14402 |
| 71 | M | White | Former  | 2012 | 1 | AC    | 25.8 |      | L3 | 7236  | 36155 |
| 69 | M | White | Former  | 2012 | 3 | AC    | 30.9 | 2012 | L3 | 29143 | 44810 |
| 65 | F | White | Former  | 2015 |   | AC    | 29.9 | 2015 | L3 | 22003 | 20121 |
| 73 | M | White | Former  | 2013 | 2 | SCC   | 28.4 | 2013 | L3 | 18682 | 34038 |
| 61 | F | White | Current | 2012 | 3 | AC    | 32.4 | 2012 | L3 | 40596 | 26055 |
| 63 | M | White | Former  | 2012 | 1 | AC    | 42.0 | 2012 | L3 | 39176 | 38533 |
| 59 | F | White | Former  | 2012 | 1 | AC    | 26.0 | 2012 | L3 | 27593 | 9823  |
| 70 | M | White | Current | 2012 | 2 | SCC   | 25.0 | 2012 | L3 | 14071 | 13755 |
| 56 | M | White | Current | 2012 | 1 | SCC   | 28.1 | 2012 | L3 | 20635 | 21872 |
| 54 | M | White | Former  | 2013 | 1 | SCC   | 18.9 | 2013 | L3 | 7089  | 5203  |

|    |   |       |         |      |   |       |      |      |    |       |       |
|----|---|-------|---------|------|---|-------|------|------|----|-------|-------|
| 51 | F | White | Current | 2013 | 1 | AC    | 21.7 | 2013 | L3 | 15692 | 10672 |
| 67 | M | White | Former  | 2012 | 1 | Other | 36.7 | 2012 | L3 | 27643 | 37577 |
| 72 | F | White | Former  | 2012 | 1 | AC    | 25.1 | 2012 | L3 | 24772 | 13012 |
| 65 | F | White | Former  | 2012 | 1 | AC    | 26.1 | 2012 | L3 | 22240 | 9643  |
| 78 | M | White | Current | 2012 | 1 | SCC   | 28.7 | 2012 | L3 | 15008 | 21824 |
| 61 | F | White | Current | 2015 | 1 | SCC   | 28.5 | 2015 | L3 | 34951 | 14175 |
| 72 | M | White | Current | 2012 | 2 | SCC   | 19.8 | 2012 | L3 | 10513 | 6084  |
| 63 | M | Black | Current | 2012 | 1 | AC    | 19.2 | 2012 | L3 | 3804  | 4572  |
| 58 | F | White | Current | 2012 | 1 | AC    | 33.5 | 2012 | L3 | 27328 | 20278 |
| 55 | M | White | Current | 2012 | 1 | AC    | 27.5 | 2012 | L3 | 14198 | 16257 |
| 62 | F | White | Current | 2012 | 1 | AC    | 19.2 | 2012 | L3 | 13734 | 3015  |
| 67 | F | Black | Former  | 2012 | 1 | AC    | 28.8 | 2012 | L3 | 13774 | 12671 |
| 80 | F | White | Former  | 2013 | 1 | AC    | 28.6 | 2012 | L2 | 22962 | 19582 |
| 81 | M | White | Former  | 2012 | 2 | Other | 25.0 | 2012 | L3 | 19795 | 28249 |
| 77 | F | White | Current | 2013 | 2 | AC    | 21.7 | 2012 | L3 | 11584 | 5463  |
| 62 | M | White | Former  | 2013 | 2 | AC    | 34.4 | 2012 | L3 | 16465 | 33201 |
| 69 | M | White | Former  | 2012 | 1 | AC    | 26.3 | 2012 | L3 | 13407 | 23435 |
| 58 | F | Black | Former  | 2013 | 3 | AC    | 24.1 | 2013 | L3 | 15203 | 4804  |
| 71 | M | White | Former  | 2013 | 1 | AC    | 34.8 | 2012 | L3 | 26997 | 43794 |
| 68 | M | White | Former  | 2013 | 1 | AC    | 29.0 | 2013 | L3 | 15459 | 30837 |
| 67 | F | White | Former  | 2014 | 1 | AC    | 29.9 | 2014 | L3 | 28111 | 11885 |
| 66 | F | White | Current | 2013 | 1 | SCC   | 19.1 | 2013 | L3 | 6672  | 2907  |
| 68 | F | Black | Current | 2013 | 1 | AC    | 43.0 | 2012 | L3 | 50862 | 29606 |
| 59 | F | Other | Former  | 2013 | 2 | AC    | 28.9 | 2013 | L3 | 21220 | 23795 |
| 72 | F | White |         | 2018 |   | AC    | 32.7 | 2018 | L1 | 17349 | 16876 |
| 60 | F | White | Former  | 2012 | 1 | AC    | 30.0 | 2012 | L3 | 34380 | 13117 |
| 71 | M | White | Current | 2013 | 2 | SCC   | 25.9 | 2013 | L3 | 19624 | 26482 |
| 72 | F | White |         | 2018 |   | AC    | 25.2 | 2018 | L2 | 13663 | 11872 |
| 55 | F | White | Former  | 2013 | 1 | SCC   | 27.8 | 2013 | L3 | 20337 | 13295 |
| 75 | M | White | Current | 2013 | 2 | SCC   | 36.3 | 2013 | L1 | 26304 | 25103 |
| 70 | M | White | Former  | 2013 | 3 | AC    | 30.1 | 2013 | L3 | 26331 | 25427 |
| 73 | M | White | Former  | 2013 | 2 | Other | 31.2 | 2013 | L3 | 36110 | 29885 |
| 64 | F | White | Current | 2013 | 2 | AC    | 25.6 | 2013 | L3 | 22551 | 22577 |
| 69 | M | Asian | Former  | 2013 | 1 | AC    | 25.5 | 2013 | L3 | 10924 | 16451 |
| 44 | M | White | Former  | 2013 | 1 | AC    | 23.2 | 2013 | L3 | 16669 | 16296 |
| 68 | M | White | Current | 2013 | 1 | AC    | 27.6 | 2013 | L3 | 17187 | 18415 |
| 80 | F | White | Former  | 2013 | 3 | SCC   | 28.9 | 2013 | L3 | 24313 | 12261 |
| 87 | M | White | Former  | 2013 | 1 | SCC   | 25.1 | 2013 | L3 | 12500 | 18559 |
| 65 | M | White | Current | 2013 | 1 | SCC   | 27.9 | 2013 | L3 | 14310 | 20917 |
| 74 | M | White | Former  | 2013 | 2 | SCC   | 27.4 | 2013 | L3 | 14653 | 39431 |
| 58 | F | White | Current | 2013 | 1 | AC    | 22.1 | 2013 | L3 | 19395 | 7393  |
| 77 | F | White | Former  | 2013 | 3 | SCC   | 23.9 | 2013 | L3 | 20003 | 11409 |
| 52 | F | White | Current | 2013 | 1 | AC    | 23.0 | 2013 | L3 | 21567 | 5303  |
| 64 | M | White | Former  | 2013 | 2 | SCC   | 33.2 | 2013 | L3 | 27381 | 40952 |
| 68 | M | White | Current | 2013 | 2 | SCC   | 30.4 | 2013 | L3 | 22275 | 33977 |
| 66 | M | Asian | Former  | 2013 | 1 | AC    | 27.2 | 2013 | L3 | 22582 | 35702 |
| 68 | M | White | Former  | 2013 | 2 | SCC   | 20.2 | 2013 | L3 | 5868  | 4771  |
| 87 | M | White | Former  | 2013 | 1 | AC    | 27.5 | 2013 | L3 | 15073 | 32701 |
| 69 | F | White | Former  | 2013 | 1 | SCC   | 25.3 | 2013 | L3 | 30357 | 13574 |
| 56 | F | White | Former  | 2013 | 1 | AC    | 26.7 | 2013 | L3 | 30569 | 11845 |
| 72 | M | Asian | Never   | 2014 | 3 | AC    | 18.6 | 2014 | L2 | 7375  | 10523 |

|    |   |       |         |      |   |       |      |      |    |       |       |
|----|---|-------|---------|------|---|-------|------|------|----|-------|-------|
| 76 | F | White | Former  | 2013 | 1 | SCC   | 30.5 | 2013 | L3 | 25145 | 16307 |
| 57 | F | White | Former  | 2013 | 2 | AC    | 40.0 | 2013 | L3 | 45717 | 26233 |
| 76 | M | White | Former  | 2013 | 1 | AC    | 34.2 | 2013 | L3 | 26398 | 57091 |
| 48 | F | Black | Current | 2013 | 2 | AC    | 24.2 | 2013 | L3 | 19364 | 15346 |
| 55 | F | White | Former  | 2013 | 1 | AC    | 34.6 | 2013 | L3 | 32601 | 23110 |
| 74 | F | White | Former  | 2015 |   | AC    | 27.3 | 2015 | L3 | 19547 | 12198 |
| 62 | M | White |         | 2018 | 4 | AC    | 31.4 | 2018 | L3 | 32892 | 19714 |
| 65 | M | White | Former  | 2013 | 1 | SCC   | 28.8 | 2013 | L3 | 19727 | 24112 |
| 76 | F | White | Former  | 2013 | 2 | SCC   | 34.2 | 2013 | L3 | 30311 | 22332 |
| 71 | F | White | Never   | 2013 | 1 | Other | 38.0 | 2013 | L3 | 61989 | 29692 |
| 58 | F | White | Former  | 2013 | 1 | AC    | 39.8 | 2013 | L3 | 46503 | 35018 |
| 53 | F | White | Former  | 2013 | 1 | AC    | 35.5 | 2013 | L3 | 30479 | 20223 |
| 57 | F | White | Former  | 2013 | 1 | AC    | 27.4 | 2013 | L3 | 22446 | 16071 |
| 76 | F | White | Former  | 2013 | 2 | AC    | 38.1 | 2013 | L3 | 16691 | 37054 |
| 71 | F | Black | Never   | 2013 | 1 | AC    | 27.8 | 2013 | L3 | 32366 | 16203 |
| 82 | M | White | Former  | 2013 | 2 | SCC   | 24.9 | 2013 | L3 | 20719 | 21476 |
| 78 | M | White | Former  | 2014 | 2 | AC    | 31.6 | 2014 | L3 | 17406 | 62400 |
| 73 | F | White | Never   | 2013 | 1 | AC    | 29.0 | 2013 | L3 | 18781 | 24215 |
| 81 | M | White | Never   | 2014 | 2 | AC    | 26.3 | 2014 | L3 | 15506 | 18459 |
| 44 | F | White | Current | 2013 | 3 | AC    | 15.7 | 2013 | L3 | 4374  | 3790  |
| 72 | M | White | Former  | 2013 | 3 | AC    | 29.0 | 2013 | L3 | 19854 | 40560 |
| 68 | F | White | Current | 2013 | 1 | SCC   | 29.2 | 2013 | L3 | 33381 | 20149 |
| 76 | M | White | Former  | 2013 |   | SCC   | 28.9 | 2013 | L3 | 30416 | 34460 |
| 70 | M | White | Former  | 2013 | 3 | SCC   | 26.7 | 2013 | L3 | 21245 | 17480 |
| 79 | F | White | Former  | 2013 | 1 | AC    | 21.8 | 2013 | L3 | 9826  | 12099 |
| 47 | F | White | Current | 2013 | 1 | Other | 39.4 | 2013 | L3 | 53719 | 19738 |
| 70 | F | White | Former  | 2014 | 4 | AC    | 36.0 | 2014 | L1 | 27110 | 12693 |
| 77 | M | White | Former  | 2013 | 1 | AC    | 27.7 | 2013 | L3 | 12502 | 26110 |
| 86 | M | White | Former  | 2013 | 2 | SCC   | 23.2 | 2013 | L3 | 9424  | 17338 |
| 57 | F | White | Current | 2013 | 1 | AC    | 20.2 | 2013 | L3 | 9116  | 3667  |
| 66 | F | White | Former  | 2013 | 4 | Other | 26.1 | 2013 | L3 | 27805 | 18460 |
| 69 | M | Other | Never   | 2013 | 1 | AC    | 29.8 | 2013 | L3 | 31951 | 32637 |
| 69 | M | White | Current | 2013 | 3 | AC    | 25.4 | 2013 | L3 | 13691 | 11546 |
| 47 | F | Black | Former  | 2014 | 1 | AC    | 24.4 | 2014 | L2 | 15117 | 1666  |
| 75 | F | White | Former  | 2013 | 1 | AC    | 23.0 | 2013 | L3 | 13906 | 13463 |
| 58 | M | Black | Former  | 2013 | 1 | AC    | 32.2 | 2013 | L3 | 30477 | 19521 |
| 70 | F | White | Former  | 2013 | 3 | SCC   | 24.9 | 2013 | L3 | 17189 | 15390 |
| 79 | M | White | Former  | 2013 | 1 | Other | 26.6 | 2013 | L3 | 18452 | 30030 |
| 54 | F | White | Current | 2013 | 1 | AC    | 19.3 | 2013 | L3 | 11133 | 4358  |
| 73 | M | White | Former  | 2013 | 1 | SCC   | 21.1 | 2013 | L3 | 10460 | 15568 |
| 66 | M | White | Former  | 2013 | 2 | SCC   | 30.4 | 2013 | L3 | 17419 | 34936 |
| 65 | F | White | Former  | 2013 | 2 | SCC   | 22.9 | 2013 | L3 | 18418 | 3562  |
| 77 | F | White | Current | 2015 | 1 | AC    | 27.7 | 2015 | L3 | 21936 | 9642  |
| 70 | M | White | Former  | 2013 | 1 | SCC   | 36.1 | 2013 | L3 | 30088 | 57733 |
| 77 | M | White | Former  | 2013 | 1 | SCC   | 26.5 | 2013 | L3 | 10850 | 26368 |
| 67 | M | White | Current | 2013 | 1 | SCC   | 23.7 | 2013 | L3 | 13503 | 13077 |
| 55 | F | White | Current | 2013 | 1 | SCC   | 19.3 | 2013 | L3 | 7897  | 3637  |
| 76 | M | White | Former  | 2013 | 2 | AC    | 21.3 | 2013 | L3 | 14695 | 15251 |
| 70 | M | White | Former  | 2014 | 1 | SCC   | 28.1 | 2014 | L3 | 15189 | 34383 |
| 56 | M | Black | Current | 2013 | 2 | SCC   | 25.2 | 2013 | L3 | 4324  | 2568  |
| 60 | F | White | Former  | 2014 | 1 | AC    | 28.4 | 2013 | L3 | 24104 | 12340 |

|    |   |       |         |      |   |       |      |      |    |       |       |
|----|---|-------|---------|------|---|-------|------|------|----|-------|-------|
| 77 | M | White | Former  | 2013 | 1 | AC    | 30.3 | 2013 | L3 | 28961 | 41471 |
| 82 | M | White | Former  | 2014 | 1 | AC    | 25.3 | 2013 | L3 | 13587 | 23345 |
| 55 | F | White | Never   | 2014 | 1 | AC    | 33.6 | 2013 | L3 | 44567 | 15964 |
| 82 | F | White | Former  | 2014 | 1 | AC    | 24.4 | 2014 | L3 | 12077 | 14762 |
| 84 | M | Black | Former  | 2014 | 2 | SCC   | 18.6 | 2014 | L3 | 21075 | 10392 |
| 78 | F | White | Former  | 2014 | 1 | Other | 29.2 | 2014 | L3 | 21865 | 17858 |
| 60 | M | White | Former  | 2013 | 1 | AC    | 26.1 | 2013 | L3 | 11893 | 25881 |
| 79 | M | White | Former  | 2013 | 1 | SCC   | 34.5 | 2013 | L3 | 21781 | 48682 |
| 66 | F | White | Former  | 2014 | 1 | SCC   | 35.0 | 2013 | L3 | 28201 | 34908 |
| 61 | M | White | Former  | 2014 | 2 | AC    | 27.3 | 2013 | L3 | 14729 | 32731 |
| 74 | F | Asian | Never   | 2013 | 1 | AC    | 19.9 | 2013 | L3 | 11636 | 12791 |
| 59 | F | White | Current | 2014 | 2 | SCC   | 27.9 | 2013 | L3 | 38191 | 14537 |
| 65 | M | White | Former  | 2014 | 1 | AC    | 24.1 | 2013 | L3 | 7203  | 6913  |
| 65 | F | White | Never   | 2014 | 1 | AC    | 18.1 | 2013 | L3 | 11794 | 7211  |
| 64 | F | White | Current | 2014 | 1 | Other | 30.6 | 2013 | L3 | 27321 | 17958 |
| 78 | F | White | Former  | 2014 | 3 | AC    | 22.3 | 2013 | L3 | 19783 | 8653  |
| 70 | F | White | Current | 2014 | 2 | SCC   | 22.4 | 2013 | L3 | 18446 | 12181 |
| 75 | M | White | Former  | 2014 | 1 | AC    | 33.1 | 2014 | L3 | 28700 | 50708 |
| 56 | M | White | Former  | 2014 | 1 | AC    | 29.1 | 2014 | L3 | 20230 | 18062 |
| 73 | M | White | Current | 2014 | 1 | SCC   | 34.2 | 2013 | L3 | 28867 | 29477 |
| 57 | F | White | Former  | 2014 | 3 | Other | 24.4 | 2013 | L3 | 27395 | 13443 |
| 53 | M | White | Former  | 2014 | 1 | SCC   | 34.5 | 2014 | L3 | 42808 | 33216 |
| 69 | F | White |         | 2018 | 4 | AC    | 21.1 | 2018 | L3 | 14792 | 6389  |
| 71 | F | White | Former  | 2014 | 1 | AC    | 29.1 | 2014 | L3 | 34669 | 12808 |
| 79 | M | White | Former  | 2014 | 1 | SCC   | 28.9 |      | L3 | 13655 | 15946 |
| 71 | M | White | Current | 2014 | 2 | Other | 24.9 | 2013 | L3 | 10055 | 18366 |
| 64 | M | White | Former  | 2014 | 2 | SCC   | 22.6 | 2014 | L3 | 7267  | 8158  |
| 61 | M | White | Former  | 2015 |   | AC    | 26.6 | 2015 | L3 | 12453 | 30245 |
| 46 | F | White |         | 2017 |   | AC    | 17.6 | 2017 | L3 | 3402  | 990   |
| 63 | F | Black |         | 2018 | 4 | AC    | 18.6 | 2018 | L3 | 6943  | 3418  |
| 71 | M | White | Current | 2014 | 2 | SCC   | 25.0 | 2014 | L3 | 24427 | 12448 |
| 81 | F | Black | Former  | 2014 | 1 | AC    | 28.4 | 2014 | L3 | 19649 | 12349 |
| 67 | F | White | Former  | 2014 | 1 | AC    | 26.3 | 2014 | L3 | 24026 | 15199 |
| 73 | M | White | Former  | 2014 | 2 | SCC   | 26.1 | 2014 | L3 | 16097 | 13420 |
| 59 | F | White | Never   | 2014 | 1 | Other | 29.4 | 2014 | L3 | 33074 | 25192 |
| 80 | M | White | Former  | 2014 | 1 | AC    | 29.8 | 2014 | L3 | 26152 | 30084 |
| 64 | F | Other | Former  | 2014 | 1 | AC    | 27.0 | 2014 | L3 | 20220 | 9779  |
| 73 | M | White | Former  | 2014 | 1 | SCC   | 26.3 | 2014 | L3 | 22503 | 24089 |
| 59 | F | White | Current | 2014 | 1 | AC    | 26.8 | 2014 | L3 | 20948 | 9492  |
| 64 | M | White | Former  | 2017 | 2 | SCC   | 35.8 | 2016 | L3 | 25152 | 40519 |
| 76 | F | White | Former  | 2014 | 2 | SCC   | 23.1 | 2014 | L3 | 12200 | 10353 |
| 77 | F | White | Former  | 2015 | 1 | AC    | 25.8 | 2014 | L3 | 23651 | 8748  |
| 72 | M | White | Former  | 2014 | 2 | AC    | 33.6 | 2014 | L3 | 12056 | 49201 |
| 71 | F | Black | Former  | 2014 | 2 | SCC   | 26.3 | 2014 | L3 | 29639 | 16046 |
| 87 | F | White | Never   | 2014 | 1 | AC    | 27.0 | 2014 | L3 | 17160 | 11050 |
| 79 | F | White | Current | 2014 | 1 | AC    | 30.9 | 2014 | L3 | 33552 | 19821 |
| 66 | F | White | Former  | 2014 | 1 | AC    | 22.1 | 2014 | L3 | 18991 | 4320  |
| 66 | F | White | Former  | 2014 | 1 | AC    | 32.1 | 2014 | L3 | 34315 | 19183 |
| 55 | M | White | Current | 2014 | 2 | AC    | 26.2 | 2014 | L3 | 11471 | 26098 |
| 78 | M | White | Former  | 2014 | 1 | AC    | 36.3 | 2014 | L3 | 25827 | 54160 |
| 74 | M | White | Current | 2014 | 1 | Other | 21.9 | 2014 | L3 | 11715 | 10123 |

|    |   |       |         |      |   |       |       |      |    |       |       |
|----|---|-------|---------|------|---|-------|-------|------|----|-------|-------|
| 80 | M | White | Former  | 2014 | 3 | SCC   | 35.2  | 2014 | L3 | 23026 | 22216 |
| 67 | M | White | Former  | 2014 | 1 | SCC   | 33.9  | 2014 | L3 | 24160 | 46144 |
| 62 | F | White | Current | 2014 |   | SCC   | 23.9  | 2014 | L3 | 21740 | 10199 |
| 60 | M | White | Former  | 2014 | 1 | AC    | 34.24 | 2014 | L3 | 26010 | 39889 |
| 75 | M | White | Former  | 2014 | 2 | AC    | 25.64 | 2014 | L3 | 17808 | 22066 |
| 71 | F | White | Current | 2014 | 1 | AC    | 18.12 | 2014 | L3 | 12177 | 3435  |
| 57 | M | White | Former  | 2014 | 1 | AC    | 27.92 | 2014 | L3 | 19011 | 23740 |
| 79 | F | Other | Former  | 2014 | 2 | AC    | 30.36 | 2014 | L3 | 32840 | 17787 |
| 73 | F | White | Current | 2015 | 1 | AC    | 31.03 | 2015 | L3 | 28685 | 15850 |
| 67 | F | White | Former  | 2014 | 1 | SCC   | 33.43 | 2014 | L3 | 33696 | 20160 |
| 66 | F | White | Never   | 2014 | 1 | AC    | 37.93 | 2014 | L3 | 41947 | 23636 |
| 71 | F | White | Former  | 2014 | 1 | SCC   | 23.67 | 2014 | L3 | 25101 | 27412 |
| 75 | F | White | Former  | 2014 | 3 | AC    | 31.04 | 2014 | L2 | 17026 | 19686 |
| 82 | M | White | Former  | 2014 | 2 | SCC   | 28.15 | 2014 | L3 | 16387 | 37792 |
| 66 | F | White | Former  | 2014 | 2 | Other | 30.72 | 2014 | L3 | 25483 | 24283 |
| 67 | F | Other | Never   | 2014 |   | AC    | 26.32 | 2014 | L3 | 15862 | 18617 |
| 87 | M | White | Former  | 2014 | 2 | SCC   | 23.96 | 2014 | L3 | 14529 | 27450 |
| 60 | M | White |         | 2018 |   | AC    | 32.9  | 2018 | L3 | 28526 | 8398  |
| 66 | M | White | Former  | 2014 | 2 | SCC   | 32.52 | 2014 | L3 | 21532 | 25310 |
| 79 | F | White | Current | 2015 | 2 | AC    | 23.54 | 2015 | L3 | 11768 | 9942  |
| 52 | F | White | Current | 2014 | 1 | SCC   | 19.06 | 2014 | L3 | 8335  | 4369  |
| 82 | F | White | Former  | 2014 | 1 | AC    | 30.71 | 2014 | L3 | 34631 | 21836 |
| 56 | F | White |         | 2018 | 3 | AC    | 27    | 2018 | L3 | 26170 | 20757 |
| 82 | F | White | Current | 2014 | 1 | SCC   | 26.75 | 2014 | L3 | 27588 | 19645 |
| 70 | F | White | Former  | 2015 | 2 | SCC   | 43.91 | 2014 | L3 | 56870 | 31603 |
| 79 | F | White |         | 2016 | 1 | AC    | 35.4  | 2016 | L1 | 37836 | 17347 |
| 71 | F | White | Former  | 2015 | 3 | Other | 40.08 | 2014 | L3 | 39289 | 20363 |
| 73 | M | White | Former  | 2015 |   | AC    | 26.92 | 2014 | L3 | 15070 | 26283 |
| 65 | F | White | Former  | 2014 | 1 | AC    | 30.97 | 2014 | L1 | 18507 | 10644 |
| 73 | F | White | Former  | 2015 | 2 | AC    | 23.99 | 2014 | L2 | 11778 | 8366  |
| 63 | F | Black |         | 2018 | 3 | AC    | 35.6  | 2018 | L3 | 37671 | 22701 |
| 75 | M |       | Former  | 2015 | 1 | AC    | 36.85 | 2015 | L3 | 32157 | 51708 |
| 65 | M | White | Former  | 2015 | 4 | AC    | 31.23 | 2015 | L3 | 22715 | 38412 |
| 77 | M | White | Former  | 2014 | 2 | AC    | 32.9  | 2014 | L3 | 21312 | 51487 |
| 74 | F | White | Former  | 2015 | 2 | AC    | 30.76 | 2014 | L1 | 20907 | 16481 |
| 74 | M |       | Former  | 2015 | 3 | SCC   | 23.77 | 2014 | L3 | 12043 | 19808 |
| 84 | F | White | Former  | 2015 |   | Other | 30.83 | 2014 | L3 | 32207 | 31002 |
| 54 | F | White | Current | 2015 | 2 | AC    | 20.39 | 2014 | L3 | 21004 | 4684  |
| 54 | F | White | Current | 2015 | 1 | AC    | 30.06 | 2014 | L3 | 34759 | 9852  |
| 78 | F | White | Current | 2015 | 1 | SCC   | 22.03 | 2015 | L3 | 12357 | 4547  |
| 77 | F | White | Current | 2015 | 1 | AC    | 24.55 | 2015 | L3 | 21290 | 21116 |
| 67 | F | White | Former  | 2015 | 1 | AC    | 36.32 | 2015 | L3 | 39014 | 23344 |
| 74 | M | White | Former  | 2015 | 1 | AC    | 26.55 | 2015 | L3 | 16545 | 28453 |
| 58 | F | White | Former  | 2015 | 1 | SCC   | 34.4  | 2014 | L3 | 40656 | 30380 |
| 78 | F | White | Former  | 2015 | 2 | AC    | 32    | 2014 | L3 | 41931 | 30637 |
| 70 | F | White | Former  | 2015 | 2 | AC    | 30.44 | 2014 | L3 | 27689 | 34770 |
| 83 | F | White | Former  | 2015 | 1 | AC    | 22.54 | 2015 | L3 | 16986 | 5960  |
| 72 | M | White | Former  | 2015 | 1 | AC    | 31.35 | 2015 | L3 | 26390 | 32727 |
| 66 | M | White |         | 2018 | 4 | AC    | 27.4  | 2018 | L3 | 15418 | 29851 |
| 70 | M | White | Current | 2015 | 1 | SCC   | 39.58 | 2015 | L3 | 49775 | 48466 |
| 54 | F | White | Former  | 2015 | 1 | AC    | 22.74 | 2015 | L3 | 21829 | 10277 |

|    |   |       |         |      |   |       |       |      |    |       |       |
|----|---|-------|---------|------|---|-------|-------|------|----|-------|-------|
| 76 | M | White | Former  | 2015 | 2 | SCC   | 34.76 | 2015 | L3 | 13972 | 37988 |
| 63 | F | White | Former  | 2015 | 1 | AC    | 27.39 | 2015 | L3 | 22101 | 17601 |
| 42 | F | White | Former  | 2015 | 2 | AC    | 36.07 | 2015 | L3 | 47205 | 7847  |
| 77 | M | White | Never   | 2015 | 2 | AC    | 24.36 | 2015 | L3 | 9469  | 11421 |
| 68 | M | White | Former  | 2015 | 1 | AC    | 27.76 | 2015 | L3 | 14377 | 19766 |
| 61 | M | White | Current | 2015 | 1 | AC    | 23.22 | 2015 | L3 | 10757 | 6141  |
| 59 | F | White | Current | 2015 | 1 | AC    | 27.51 | 2015 | L3 | 27296 | 22517 |
| 59 | F | White | Former  | 2015 | 1 | AC    | 29.78 | 2015 | L3 | 19328 | 10012 |
| 53 | M | White | Never   | 2015 | 3 | AC    | 30.71 | 2015 | L3 | 24036 | 25737 |
| 69 | F | White | Former  | 2015 | 2 | SCC   | 25.8  | 2015 | L3 | 18698 | 20764 |
| 74 | M | White | Former  | 2017 | 2 | SCC   | 31.3  | 2016 | L3 | 13778 | 35033 |
| 75 | M | White | Former  | 2015 | 1 | SCC   | 28.02 | 2015 | L3 | 18809 | 36911 |
| 65 | F | White | Former  | 2015 | 1 | AC    | 31.76 | 2015 | L3 | 32302 | 24696 |
| 72 | F | White |         | 2018 | 4 | AC    | 31.7  | 2018 | L1 | 27314 | 19403 |
| 68 | M | White | Former  | 2015 | 1 | AC    | 22.79 | 2015 | L3 | 10140 | 4186  |
| 67 | F | White | Never   | 2015 | 1 | Other | 33.76 | 2015 | L3 | 28027 | 15416 |
| 69 | F | White |         | 2016 | 3 | AC    | 46.5  | 2016 | L3 | 62941 | 31047 |
| 61 | F | White | Current | 2015 | 1 | SCC   | 20.54 | 2015 | L3 | 14605 | 14171 |
| 54 | M | White |         | 2015 |   | SCC   | 26.8  | 2015 | L3 | 17426 | 20340 |
| 72 | F | White | Former  | 2015 | 3 | AC    | 35.78 | 2015 | L3 | 33112 | 28213 |
| 78 | M | White | Current | 2015 | 2 | AC    | 27.31 | 2015 | L3 | 21458 | 22717 |
| 66 | F | White | Current | 2015 | 2 | AC    | 23.02 | 2015 | L3 | 20534 | 9934  |
| 60 | M | White | Never   | 2015 | 1 | AC    | 27.3  | 2015 | L3 | 19526 | 26103 |
| 47 | F | White | Former  | 2015 | 1 | AC    | 24.37 | 2015 | L3 | 17357 | 9572  |
| 71 | F | White | Former  | 2015 | 1 | AC    | 28.76 | 2015 | L3 | 24917 | 18317 |
| 67 | M | White | Never   | 2015 | 2 | SCC   | 22.86 | 2015 | L3 | 11086 | 7171  |
| 84 | F | White | Former  | 2015 | 1 | AC    | 29.63 | 2015 | L3 | 21278 | 21040 |
| 65 | F | White | Former  | 2015 | 2 | AC    | 31.82 | 2015 | L3 | 38820 | 37204 |
| 86 | F | White | Former  | 2015 | 1 | SCC   | 25.97 | 2015 | L3 | 28482 | 16394 |
| 49 | M | White |         | 2017 |   | AC    | 18.7  | 2017 | L2 | 4506  | 2872  |
| 69 | F | White | Former  | 2015 | 1 | AC    | 33.96 | 2015 | L3 | 29013 | 26714 |
| 79 | F | White | Former  | 2015 | 1 | SCC   | 29.47 | 2015 | L3 | 22542 | 11115 |
| 71 | F | White | Former  | 2015 | 1 | SCC   | 19.61 | 2015 | L3 | 10631 | 9474  |
| 75 | F | White | Former  | 2015 | 2 | SCC   | 25.74 | 2015 | L3 | 16394 | 10082 |
| 46 | M | White | Current | 2015 | 2 | SCC   | 36.21 | 2015 | L3 | 35753 | 27433 |
| 76 | F | White | Never   | 2015 | 2 | AC    | 27.92 | 2015 | L3 | 21898 | 18146 |
| 67 | F | White | Former  | 2015 | 2 | AC    | 35.81 | 2015 | L3 | 43028 | 35204 |
| 46 | F | White | Former  | 2015 | 1 | AC    | 24.65 | 2015 | L3 | 18789 | 6193  |
| 69 | M | White | Former  | 2015 | 2 | AC    | 36.17 | 2015 | L3 | 51943 | 39484 |
| 73 | F | White | Never   | 2015 | 3 | SCC   | 33.05 | 2015 | L3 | 39234 | 27363 |
| 71 | F | White | Former  | 2015 | 1 | Other | 28.28 | 2015 | L3 | 21000 | 22216 |
| 65 | M | White | Former  | 2015 | 1 | AC    | 27.34 | 2015 | L3 | 12031 | 19152 |
| 63 | F | White | Never   | 2015 | 1 | Other | 37.29 | 2015 | L3 | 49281 | 21373 |
| 73 | M | White | Former  | 2015 | 2 | SCC   | 29.26 | 2015 | L3 | 22168 | 35977 |
| 29 | F | White | Former  | 2015 | 2 | Other | 24.04 | 2015 | L1 | 4813  | 2195  |
| 73 | M | White | Current | 2015 | 1 | AC    | 23.89 | 2015 | L3 | 9920  | 12807 |
| 68 | F | White | Never   | 2015 | 1 | AC    | 27.47 | 2015 | L3 | 24547 | 9852  |
| 73 | M | White | Former  | 2015 | 1 | SCC   | 27.62 | 2015 | L3 | 12811 | 24403 |
| 65 | M | White | Former  | 2015 | 1 | AC    | 18.36 | 2015 | L3 | 5566  | 9604  |
| 63 | M | White | Current | 2015 | 1 | SCC   | 29.89 | 2015 | L3 | 16318 | 30354 |
| 80 | F | White | Former  | 2015 | 3 | Other | 17.8  | 2015 | L3 | 3418  | 4010  |

|    |   |       |         |      |   |       |       |      |    |       |       |
|----|---|-------|---------|------|---|-------|-------|------|----|-------|-------|
| 67 | F | White |         | 2015 |   | AC    | 19.8  | 2015 | L3 | 5142  | 3854  |
| 62 | F | White | Current | 2015 | 1 | AC    | 24.95 | 2015 | L3 | 23067 | 11767 |
| 77 | M | White | Former  | 2015 | 1 | SCC   | 26.85 | 2015 | L3 | 22887 | 36468 |
| 69 | F | White | Former  | 2015 | 1 | AC    | 25.62 | 2015 | L3 | 14397 | 11252 |
| 86 | F | Black | Former  | 2015 | 1 | SCC   | 30.35 | 2015 | L3 | 29685 | 10854 |
| 70 | M | White | Current | 2015 | 1 | AC    | 34.61 | 2015 | L3 | 37702 | 37884 |
| 78 | M | White | Former  | 2015 | 1 | AC    | 25.21 | 2015 | L3 | 21918 | 16432 |
| 76 | F | White | Former  | 2015 | 3 | AC    | 21.14 | 2015 | L3 | 8737  | 6351  |
| 38 | F | White | Current | 2015 | 3 | Other | 38.16 | 2015 | L3 | 53190 | 20330 |
| 83 | F | White | Former  | 2015 | 2 | AC    | 31.38 | 2015 | L3 | 38179 | 17919 |
| 59 | F | White | Former  | 2015 | 1 | AC    | 26.06 | 2015 | L3 | 37454 | 9537  |
| 62 | M | White | Former  | 2015 | 1 | AC    | 26.74 | 2015 | L3 | 13941 | 22035 |
| 64 | F | White | Former  | 2015 | 1 | AC    | 36.52 | 2015 | L3 | 31043 | 31997 |
| 66 | M | White | Former  | 2015 | 1 | AC    | 26.06 | 2015 | L3 | 14815 | 27413 |
| 80 | F | White | Never   | 2015 | 2 | AC    | 22.44 | 2015 | L3 | 20719 | 13914 |
| 70 | M | White | Former  | 2015 | 1 | AC    | 41.99 | 2015 | L3 | 34384 | 69879 |
| 59 | F | White | Former  | 2015 | 1 | AC    | 25.85 | 2015 | L3 | 23832 | 10705 |
| 68 | M | White | Former  | 2015 | 1 | Other | 28.28 | 2015 | L3 | 15716 | 21285 |
| 49 | F | White | Current | 2015 | 1 | AC    | 23.17 | 2015 | L3 | 16233 | 9479  |
| 56 | M |       | Current | 2015 | 2 | SCC   | 31.96 | 2015 | L3 | 25997 | 26335 |
| 66 | F | White | Never   | 2015 | 1 | AC    | 29.37 | 2015 | L3 | 22244 | 13829 |
| 72 | F | White | Current | 2015 | 2 | SCC   | 23.85 | 2015 | L3 | 22411 | 5231  |
| 56 | M | White |         | 2017 |   | Other | 27.4  | 2017 | L3 | 16207 | 24511 |
| 54 | F |       | Former  | 2015 | 1 | AC    | 38.25 | 2015 | L3 | 52808 | 22337 |
| 70 | F | White | Former  | 2015 |   | SCC   | 36.71 | 2015 | L3 | 36734 | 25086 |
| 69 | F | White | Former  | 2015 | 1 | SCC   | 44.89 | 2015 | L3 | 55332 | 26000 |
| 64 | F | White | Current | 2015 | 1 | AC    | 29.6  | 2015 | L3 | 22465 | 33238 |
| 79 | M | White |         | 2017 | 3 | AC    | 39.9  | 2017 | L3 | 67201 | 29611 |
| 66 | M | Black |         | 2017 |   | SCC   | 22.1  | 2017 | L3 | 15946 | 14581 |
| 70 | F | White | Former  | 2015 | 1 | AC    | 29.53 | 2015 | L3 | 31426 | 10465 |
| 55 | M | White | Former  | 2015 | 1 | AC    | 26.16 | 2015 | L3 | 21571 | 21266 |
| 64 | F | White |         | 2018 |   | AC    | 23.6  | 2018 | L3 | 20720 | 10761 |
| 65 | F | White | Former  | 2015 | 1 | SCC   | 36.18 | 2015 | L3 | 43905 | 19960 |
| 53 | F | White |         | 2018 |   | AC    | 30.6  | 2017 | L3 | 18919 | 14495 |
| 57 | F | White | Current | 2015 |   | AC    | 20.46 | 2015 | L3 | 10221 | 2703  |
| 59 | F | Black | Current | 2015 | 1 | Other | 25.03 | 2015 | L3 | 31094 | 13515 |
| 70 | F | White |         | 2018 | 4 | AC    | 25.6  | 2018 | L3 | 19775 | 10955 |
| 56 | M | Asian |         | 2017 |   | AC    | 23.3  | 2017 | L1 | 4421  | 6821  |
| 50 | M | White | Current | 2016 | 2 | AC    | 18.9  | 2016 | L3 | 2749  | 3584  |
| 65 | F | White |         | 2016 | 2 | AC    | 23.8  | 2016 | L3 | 21443 | 26537 |
| 73 | M | White |         | 2018 |   | SCC   | 32.2  | 2018 | L3 | 30122 | 45868 |
| 77 | M | White |         | 2018 | 2 | AC    | 29.6  | 2018 | L3 | 10490 | 51959 |
| 73 | F | White | Former  | 2017 | 2 | AC    | 20.7  | 2017 | L3 | 32308 | 20321 |
| 67 | M | White |         | 2016 |   | SCC   | 26    | 2016 | L3 | 14001 | 35294 |
| 47 | F | White | Former  | 2016 | 2 | AC    | 30.2  | 2016 | L3 | 40422 | 10873 |
| 75 | M | White | Current | 2016 | 2 | SCC   | 28.4  | 2016 | L3 | 14780 | 34077 |
| 60 | F | White |         | 2016 | 1 | AC    | 23    | 2016 | L3 | 19054 | 4659  |
| 66 | F | Other |         | 2018 | 4 | AC    | 20.5  | 2018 | L2 | 11786 | 4686  |
| 61 | M | White |         | 2018 | 4 | AC    | 28.3  | 2018 | L3 | 16320 | 27735 |
| 79 | F | Black |         | 2016 |   | AC    | 26    | 2016 | L3 | 24596 | 21513 |
| 68 | M | White |         | 2016 |   | SCC   | 30.5  | 2016 | L2 | 14207 | 44286 |



|    |   |       |         |      |   |       |      |      |    |       |       |
|----|---|-------|---------|------|---|-------|------|------|----|-------|-------|
| 55 | F | White | Current | 2019 | 3 | AC    | 22.2 | 2019 | L1 | 8845  | 7420  |
| 65 | M | White | Former  | 2016 | 2 | SCC   | 31.2 | 2016 | L3 | 40313 | 23350 |
| 74 | F | White |         | 2017 |   | AC    | 31.2 | 2017 | L2 | 24161 | 10181 |
| 65 | M | Other |         | 2018 | 4 | AC    | 24.2 | 2018 | L3 | 15268 | 20354 |
| 70 | M | White | Former  | 2016 | 2 | AC    | 30.5 | 2016 | L3 | 17728 | 27752 |
| 49 | M | White | Former  | 2016 | 2 | SCC   | 19   | 2016 | L1 | 2995  | 4082  |
| 61 | M | White | Former  | 2017 | 3 | AC    | 26.5 | 2017 | L3 | 14049 | 13880 |
| 61 | F | White | Current | 2016 | 2 | AC    | 17   | 2016 | L3 | 3803  | 1038  |
| 64 | F | White |         | 2016 |   | SCC   | 25.2 | 2016 | L3 | 14306 | 7001  |
| 58 | M | White | Current | 2016 | 3 | AC    | 26   | 2016 | L3 | 15544 | 13934 |
| 43 | F | White | Never   | 2016 | 2 | Other | 24.8 | 2016 | L3 | 20946 | 5484  |
| 47 | M | White | Current | 2016 | 4 | AC    | 27.4 | 2016 | L3 | 13076 | 17879 |
| 73 | F | White | Former  | 2017 | 2 | Other | 31.6 | 2017 | L3 | 30432 | 14082 |
| 62 | M | White | Current | 2016 | 2 | AC    | 22.7 | 2016 | L3 | 5754  | 24790 |
| 74 | M | White |         | 2016 |   | AC    | 29.4 | 2016 | L3 | 14127 | 33968 |
| 70 | F | White | Former  | 2017 | 3 | AC    | 32.8 | 2016 | L1 | 27146 | 17833 |
| 62 | M | White | Current | 2017 | 2 | AC    | 26.6 | 2016 | L3 | 16545 | 22436 |
| 63 | F | White | Former  | 2017 | 3 | AC    | 22.3 | 2017 | L3 | 22108 | 7799  |
| 66 | M | White |         | 2017 |   | AC    | 30.3 | 2017 | L3 | 30884 | 20698 |
| 72 | F | White |         | 2017 | 4 | AC    | 28.4 | 2017 | L3 | 12516 | 15290 |
| 74 | F | White | Former  | 2017 | 2 | SCC   | 25.9 | 2017 | L3 | 33409 | 22725 |
| 81 | M | White |         | 2017 |   | SCC   | 32.4 | 2017 | L3 | 29019 | 32966 |
| 56 | M | White |         | 2017 |   | SCC   | 31.7 | 2017 | L3 | 13960 | 34776 |
| 65 | F | White | Current | 2017 | 2 | SCC   | 22.8 | 2017 | L3 | 19393 | 12049 |
| 60 | M | White |         | 2018 |   | Other | 21.6 | 2018 | L3 | 16263 | 8564  |
| 89 | M | White | Current | 2017 | 3 | SCC   | 26.1 | 2017 | L3 | 16434 | 21146 |
| 75 | M | White | Current | 2019 | 4 | SCC   | 15.7 | 2019 | L3 | 3354  | 5311  |
| 57 | F | White | Current | 2017 | 2 | AC    | 24   | 2017 | L3 | 14751 | 9902  |
| 86 | F | White |         | 2017 |   | AC    | 28.1 | 2017 | L3 | 34088 | 25476 |
| 66 | M | White | Former  | 2017 | 3 | SCC   | 24.1 | 2017 | L3 | 11859 | 17810 |
| 68 | F | White | Former  | 2017 | 3 | AC    | 26.5 | 2017 | L3 | 20949 | 20710 |
| 63 | F | White | Former  | 2017 |   | AC    | 34.3 | 2017 | L3 | 24723 | 22570 |
| 75 | F | White |         | 2017 |   | AC    | 21.1 | 2017 | L3 | 8326  | 10357 |
| 68 | F | White |         | 2017 |   | AC    | 28.2 | 2017 | L3 | 25274 | 14875 |
| 60 | F | White | Current | 2017 | 2 | SCC   | 30.4 | 2017 | L3 | 27754 | 14734 |
| 54 | F | White | Former  | 2017 | 1 | AC    | 31   | 2017 | L3 | 44783 | 15147 |
| 54 | F | White |         | 2018 |   | AC    | 29.7 | 2018 | L2 | 23198 | 13247 |
| 70 | M | White | Former  | 2017 | 2 | Other | 31.9 | 2017 | L3 | 17249 | 46212 |
| 62 | F | White | Former  | 2019 | 3 | AC    | 27.4 | 2019 | L3 | 34730 | 19224 |
| 61 | M | White | Current | 2017 | 4 | Other | 38.2 | 2017 | L3 | 28564 | 40710 |
| 84 | F | White | Former  | 2017 | 2 | Other | 24.4 | 2017 | L3 | 7767  | 8359  |
| 56 | M | White |         | 2017 | 1 | Other | 20.5 | 2017 | L3 | 5484  | 4173  |
| 76 | F | White |         | 2017 |   | SCC   | 29.9 | 2017 | L3 | 42197 | 17272 |
| 66 | M | White | Current | 2017 | 4 | AC    | 20.7 | 2017 | L3 | 3377  | 7331  |
| 55 | M | White |         | 2017 | 4 | AC    | 26.2 | 2017 | L3 | 12689 | 18619 |
| 73 | F | Black |         | 2017 |   | AC    | 23   | 2017 | L3 | 25222 | 5945  |
| 62 | M | White |         | 2017 |   | AC    | 23.8 | 2017 | L3 | 11771 | 10681 |
| 64 | F | White |         | 2017 | 4 | AC    | 31.3 | 2018 | L3 | 26751 | 16074 |
| 73 | M | White |         | 2018 |   | SCC   | 29.2 | 2018 | L3 | 17775 | 28369 |
| 56 | F | White | Current | 2017 | 2 | AC    | 24.3 | 2017 | L3 | 14771 | 4404  |
| 55 | M | White |         | 2017 |   | AC    | 31   | 2017 | L3 | 18281 | 38945 |

|    |   |       |         |      |   |       |      |      |    |       |       |
|----|---|-------|---------|------|---|-------|------|------|----|-------|-------|
| 59 | F | White |         | 2017 | 4 | AC    | 23.7 | 2017 | L3 | 21658 | 16743 |
| 59 | M | White |         | 2017 |   | Other | 24.3 | 2017 | L3 | 13360 | 26968 |
| 73 | M | White | Former  | 2017 | 3 | AC    | 27.1 | 2017 | L3 | 24058 | 24154 |
| 73 | F | White |         | 2017 |   | AC    | 30.5 | 2017 | L3 | 26470 | 22697 |
| 69 | M | Asian |         | 2017 |   | AC    | 27.1 | 2017 | L3 | 15814 | 24598 |
| 76 | M | White | Never   | 2017 | 3 | SCC   | 22.6 | 2017 | L3 | 7074  | 11595 |
| 56 | M | White |         | 2017 |   | AC    | 32.6 | 2017 | L3 | 18728 | 35099 |
| 71 | M | White | Former  | 2017 | 3 | AC    | 27.4 | 2017 | L3 | 12648 | 26497 |
| 49 | M | Asian |         | 2017 | 4 | AC    | 30.9 | 2017 | L3 | 15940 | 39196 |
| 69 | M | Other |         | 2017 |   | Other | 25.5 | 2017 | L3 | 14379 | 20632 |
| 53 | M | White |         | 2018 | 1 | AC    | 29.6 | 2018 | L3 | 15807 | 20664 |
| 55 | F | White | Current | 2017 | 4 | AC    | 22.4 | 2017 | L3 | 14799 | 10264 |
| 78 | F | White |         | 2017 | 2 | AC    | 27.5 | 2017 | L3 | 22566 | 23780 |
| 63 | M | White |         | 2017 |   | AC    | 33.9 | 2017 | L3 | 37233 | 24753 |
| 77 | M | Black |         | 2018 |   | SCC   | 21.5 | 2018 | L3 | 10108 | 20348 |
| 66 | M | White |         | 2018 | 3 | AC    | 30.1 | 2018 | L3 | 31723 | 30111 |
| 64 | F | White |         | 2017 |   | SCC   | 17.2 | 2017 | L3 | 4206  | 3126  |
| 65 | F | White |         | 2017 | 4 | AC    | 23.7 | 2017 | L3 | 16921 | 10266 |
| 52 | F | White |         | 2017 |   | AC    | 25.8 | 2017 | L3 | 24819 | 13951 |
| 84 | M | White |         | 2017 |   | Other | 28.2 | 2017 | L3 | 11771 | 31642 |
| 69 | M | White |         | 2017 |   | AC    | 31.8 | 2017 | L3 | 21094 | 30881 |
| 74 | M | White |         | 2017 | 3 | SCC   | 31   | 2017 | L3 | 20867 | 41171 |
| 52 | F | White |         | 2017 | 4 | Other | 20.9 | 2017 | L2 | 9994  | 6016  |
| 61 | F | White |         | 2017 | 4 | AC    | 30.9 | 2017 | L3 | 27191 | 27279 |
| 74 | F | White |         | 2017 | 2 | AC    | 24.7 | 2017 | L3 | 21022 | 14795 |
| 63 | M | White |         | 2017 |   | AC    | 19.6 | 2017 | L3 | 8357  | 5498  |
| 74 | M | White | Former  | 2018 | 2 | SCC   | 23.1 | 2018 | L3 | 7530  | 9163  |
| 55 | F | White |         | 2017 | 4 | AC    | 23.3 | 2017 | L3 | 17139 | 7806  |
| 26 | F | White |         | 2017 |   | AC    | 35.7 | 2017 | L3 | 48637 | 13874 |
| 64 | M | White | Former  | 2018 | 4 | AC    | 30.3 | 2017 | L3 | 28466 | 39016 |
| 75 | F | White |         | 2017 |   | AC    | 20.6 | 2017 | L3 | 10672 | 14501 |
| 78 | F | White |         | 2017 |   | Other | 30.4 | 2017 | L3 | 24291 | 18833 |
| 72 | F | White |         | 2017 |   | Other | 25.7 | 2017 | L3 | 27445 | 21074 |
| 78 | M | White |         | 2017 | 3 | AC    | 24.9 | 2017 | L3 | 21965 | 14952 |
| 75 | M | White |         | 2018 | 4 | AC    | 19.1 | 2018 | L3 | 6326  | 6647  |
| 76 | M | White |         | 2018 |   | SCC   | 35.5 | 2018 | L3 | 15865 | 57351 |
| 61 | F | Black |         | 2018 |   | AC    | 20.2 | 2018 | L3 | 14991 | 11884 |
| 67 | M | White |         | 2018 |   | SCC   | 22   | 2018 | L3 | 6430  | 11561 |
| 64 | M | White |         | 2018 | 4 | AC    | 30.8 | 2018 | L3 | 23656 | 25404 |
| 86 | F | White |         | 2018 | 4 | AC    | 21.8 | 2018 | L2 | 6729  | 5051  |
| 38 | F | White |         | 2017 | 4 | AC    | 32.1 | 2017 | L3 | 31867 | 15121 |
| 89 | F | White |         | 2017 |   | AC    | 22.3 | 2017 | L3 | 12668 | 10315 |
| 57 | M | White |         | 2017 |   | AC    | 31.4 | 2017 | L3 | 28215 | 20739 |
| 61 | M | White | Current | 2019 | 4 | Other | 31.9 | 2018 | L3 | 14943 | 40570 |
| 84 | M | White |         | 2017 |   | AC    | 25.8 | 2017 | L3 | 13184 | 18672 |
| 84 | F | White |         | 2017 | 4 | AC    | 20.1 | 2017 | L3 | 4497  | 3239  |
| 53 | F | White |         | 2017 | 4 | AC    | 27.5 | 2017 | L3 | 30837 | 17435 |
| 85 | F | White |         | 2017 | 4 | AC    | 23.5 | 2017 | L3 | 9496  | 10612 |
| 74 | F | Asian |         | 2017 |   | AC    | 14.5 | 2017 | L3 | 4593  | 2555  |
| 58 | F | White |         | 2018 |   | AC    | 32.1 | 2018 | L3 | 39288 | 16150 |
| 63 | F | White |         | 2018 | 4 | AC    | 24.6 | 2018 | L3 | 16360 | 11124 |

|    |   |       |         |      |   |       |      |      |    |       |       |
|----|---|-------|---------|------|---|-------|------|------|----|-------|-------|
| 64 | M | White |         | 2018 |   | AC    | 26.7 | 2018 | L3 | 12672 | 24537 |
| 72 | F | White |         | 2018 | 1 | SCC   | 21.6 | 2018 | L3 | 10978 | 6989  |
| 47 | F | White |         | 2017 | 4 | AC    | 37.3 | 2018 | L3 | 39931 | 18955 |
| 43 | M | Black | Former  | 2018 | 4 | Other | 19.5 | 2018 | L3 | 3158  | 5408  |
| 71 | M | White |         | 2018 | 1 | AC    | 32.6 | 2018 | L3 | 37251 | 37218 |
| 79 | F | White |         | 2018 | 4 | AC    | 27.5 | 2018 | L3 | 29835 | 13293 |
| 49 | M | White |         | 2018 |   | SCC   | 20.6 | 2018 | L3 | 3450  | 3129  |
| 50 | F | White |         | 2018 |   | AC    | 33.6 | 2018 | L3 | 48112 | 17323 |
| 65 | M | White |         | 2018 | 4 | AC    | 26.1 | 2018 | L3 | 16478 | 22329 |
| 58 | M | White |         | 2018 | 4 | AC    | 22.2 | 2017 | L3 | 9370  | 10943 |
| 61 | M | White |         | 2018 |   | AC    | 22.4 | 2018 | L3 | 3562  | 5232  |
| 64 | F | White |         | 2018 | 4 | Other | 37.3 | 2018 | L3 | 48351 | 28658 |
| 58 | F | Black |         | 2018 |   | AC    | 29   | 2018 | L3 | 30336 | 8514  |
| 71 | M | White |         | 2018 |   | SCC   | 34.5 | 2018 | L3 | 30441 | 41829 |
| 61 | M | White |         | 2018 |   | Other | 29.4 | 2018 | L3 | 24316 | 24705 |
| 54 | F | White |         | 2018 | 4 | AC    | 32.5 | 2018 | L3 | 41178 | 16180 |
| 81 | M | White |         | 2018 |   | Other | 31.1 | 2018 | L2 | 11231 | 30004 |
| 69 | F | White |         | 2018 |   | AC    | 31.3 | 2018 | L3 | 40271 | 20435 |
| 53 | F | Black |         | 2018 | 4 | AC    | 19.2 | 2018 | L3 | 11331 | 7163  |
| 71 | F | White |         | 2018 |   | AC    | 27.9 | 2018 | L3 | 19195 | 15342 |
| 74 | M | White |         | 2018 |   | AC    | 26.9 | 2018 | L3 | 21727 | 35016 |
| 74 | F | White |         | 2018 | 4 | AC    | 25.9 | 2018 | L3 | 18032 | 16021 |
| 80 | M | White |         | 2018 |   | AC    | 24.1 | 2018 | L3 | 13439 | 11446 |
| 68 | F | White | Former  | 2019 |   | AC    | 34   | 2019 | L3 | 40904 | 19026 |
| 45 | M | White |         | 2019 |   | Other | 28.8 | 2018 | L3 | 17294 | 24590 |
| 71 | F | White | Former  | 2018 | 4 | AC    | 26.1 | 2018 | L3 | 36996 | 19982 |
| 80 | F | White |         | 2018 |   | AC    | 25.9 | 2018 | L3 | 14024 | 12930 |
| 68 | M | White |         | 2018 |   | Other | 27.9 | 2018 | L1 | 9296  | 32735 |
| 60 | M | Black |         | 2018 |   | AC    | 16   | 2018 | L3 | 2124  | 2508  |
| 56 | F | White |         | 2018 | 4 | AC    | 30.5 | 2018 | L3 | 17294 | 10221 |
| 69 | M | White |         | 2018 | 4 | Other | 27.7 | 2018 | L3 | 16196 | 29805 |
| 59 | F | White |         | 2018 |   | SCC   | 15.1 | 2018 | L3 | 476   | 970   |
| 79 | F | White |         | 2018 | 4 | AC    | 24.3 | 2018 | L3 | 18379 | 12440 |
| 90 | M | White |         | 2018 | 3 | AC    | 22   | 2018 | L3 | 8563  | 20520 |
| 56 | M | White |         | 2018 |   | Other | 29   | 2018 | L3 | 21579 | 29902 |
| 66 | M | White |         | 2018 |   | SCC   | 25.1 | 2018 | L3 | 14805 | 15198 |
| 64 | M | White |         | 2018 | 4 | Other | 26.5 | 2018 | L3 | 20551 | 33282 |
| 57 | M | White |         | 2018 |   | Other | 26.2 | 2018 | L3 | 17318 | 12357 |
| 80 | F | White |         | 2018 | 4 | AC    | 29.4 | 2018 | L3 | 17203 | 16269 |
| 81 | M | White |         | 2018 | 4 | AC    | 20.4 | 2018 | L3 | 9795  | 13507 |
| 68 | F | White |         | 2018 |   | AC    | 28.2 | 2018 | L3 | 23680 | 16352 |
| 55 | M |       |         | 2018 | 4 | AC    | 19.3 | 2018 | L3 | 5496  | 11073 |
| 79 | F | Black |         | 2018 |   | Other | 29.1 | 2018 | L3 | 15312 | 10224 |
| 64 | M | White |         | 2018 |   | AC    | 25.6 | 2018 | L3 | 10405 | 17203 |
| 70 | M | White |         | 2018 |   | AC    | 31.5 | 2018 | L3 | 21200 | 39230 |
| 57 | M | White | Current | 2018 | 4 | AC    | 22.1 | 2018 | L3 | 6526  | 11723 |
| 49 | F | White |         | 2018 | 4 | AC    | 25.2 | 2018 | L3 | 21290 | 23532 |
| 64 | F | White | Never   | 2018 |   | Other | 29.6 | 2018 | L3 | 21716 | 17752 |
| 74 | F | White | Current | 2018 | 1 | AC    | 38.1 | 2018 | L3 | 3877  | 1756  |
| 65 | M | White | Current | 2019 |   | Other | 26.2 | 2019 | L3 | 16005 | 24816 |
| 74 | F | White | Current | 2019 | 1 | AC    | 26.6 | 2019 | L1 | 27189 | 21040 |

|    |   |       |         |      |   |       |       |      |    |       |       |
|----|---|-------|---------|------|---|-------|-------|------|----|-------|-------|
| 67 | M | White | Current | 2018 | 3 | Other | 33.9  | 2018 | L3 | 19971 | 34239 |
| 56 | F | White | Current | 2019 |   | Other | 32.5  | 2019 | L3 | 30199 | 20343 |
| 81 | M | White | Former  | 2019 | 3 | SCC   | 28.9  | 2018 | L3 | 23385 | 30889 |
| 67 | M | White | Current | 2019 | 2 | SCC   | 36.8  | 2019 | L1 | 19923 | 51046 |
| 54 | F | White | Former  | 2019 | 3 | AC    | 23.1  | 2019 | L3 | 14921 | 5797  |
| 81 | M | White | Former  | 2019 | 3 | SCC   | 25.9  | 2019 | L3 | 17263 | 24151 |
| 71 | F | White | Current | 2019 | 2 | SCC   | 34.6  | 2019 | L3 | 30713 | 36308 |
| 70 | M | White | Former  | 2019 | 4 | Other | 38.9  | 2019 | L1 | 11922 | 31568 |
| 51 | F | White | Never   | 2019 | 1 | AC    | 33    | 2019 | L3 | 43410 | 20523 |
| 58 | F | White | Current | 2019 |   | AC    | 30.1  | 2019 | L3 | 31011 | 21539 |
| 68 | F | White | Former  | 2019 | 1 | AC    | 22.8  | 2019 | L3 | 12249 | 10061 |
| 65 | F | White | Current | 2019 | 1 | SCC   | 24.9  | 2019 | L3 | 27327 | 12948 |
| 69 | M | White | Current | 2019 | 3 | SCC   | 32.5  | 2019 | L3 | 27655 | 25547 |
| 73 | M | White | Former  | 2019 | 3 | AC    | 30.8  | 2019 | L3 | 18388 | 40856 |
| 63 | F | White | Current | 2019 | 2 | AC    | 29.3  | 2019 | L3 | 35297 | 23401 |
| 62 | F | White | Current | 2019 | 1 | SCC   | 25.5  | 2019 | L3 | 21588 | 13488 |
| 60 | F | White | Former  | 2019 | 1 | AC    | 33.1  | 2019 | L3 | 50422 | 13264 |
| 73 | F | White | Former  | 2019 | 2 | SCC   | 24.2  | 2019 | L3 | 28318 | 11361 |
| 48 | M | White |         | 2019 | 3 | SCC   | 27.2  | 2019 | L3 | 13375 | 16849 |
| 68 | F | Other | Never   | 2019 | 1 | AC    | 30.5  | 2019 | L3 | 31310 | 20712 |
| 69 | M | White | Former  | 2019 | 2 | Other | 30.6  | 2019 | L3 | 18662 | 49508 |
| 59 | F | White | Former  | 2019 | 1 | Other | 21.2  | 2019 | L3 | 11420 | 4680  |
| 43 | F | White | Former  | 2019 | 2 | AC    | 27.1  | 2019 | L3 | 25043 | 13472 |
| 74 | M | White | Current | 2019 | 1 | AC    | 23    | 2019 | L3 | 7398  | 11600 |
| 74 | F | White | Former  | 2019 | 2 | AC    | 28.9  | 2019 | L3 | 24971 | 16376 |
| 73 | M | White | Former  | 2019 | 1 | AC    | 27.8  | 2019 | L3 | 11800 | 36441 |
| 62 | F | White | Former  | 2015 | 1 | Other | 36.89 | 2015 | L3 | 35832 | 38632 |
| 66 | M | White | Former  | 2012 | 3 | SCC   | 25.92 | 2012 | L3 | 19306 | 24276 |
| 64 | M | White | Former  | 2020 |   | Other | 23.9  | 2020 | L1 | 8701  | 13378 |
| 84 | F | White | Former  | 2019 | 1 | AC    | 14.7  | 2019 | L3 | 3708  | 2863  |
| 62 | M | White | Former  | 2020 |   | Other | 19.6  | 2020 | L3 | 4045  | 3198  |
| 80 | F | White | Former  | 2019 | 2 | Other | 19.8  | 2019 | L3 | 5772  | 2335  |
| 62 | F | White | Current | 2019 | 4 | SCC   | 18.4  | 2019 | L3 | 7250  | 3589  |
| 58 | F | Black | Current | 2020 | 2 | Other | 20.4  | 2019 | L3 | 8880  | 3820  |
| 71 | F | White | Former  | 2020 | 1 | Other | 18    | 2019 | L3 | 9762  | 3575  |
| 51 | M | White | Former  | 2020 | 1 | AC    | 26.5  | 2019 | L3 | 8389  | 7376  |
| 57 | M | White | Former  | 2020 |   | SCC   | 22.1  | 2020 | L3 | 8597  | 8275  |
| 75 | M | White | Former  | 2020 | 4 | Other | 24    | 2020 | L3 | 8692  | 13012 |
| 70 | F | White | Former  | 2019 | 1 | AC    | 22.9  | 2019 | L3 | 18494 | 4459  |
| 47 | M | White | Current | 2020 | 1 | AC    | 21.1  | 2019 | L3 | 10217 | 13947 |
| 57 | F | White | Never   | 2019 | 3 | AC    | 23.8  | 2019 | L3 | 20638 | 3553  |
| 63 | M | Black | Current | 2020 | 1 | AC    | 24.6  | 2019 | L3 | 10900 | 15296 |
| 83 | M | White | Former  | 2019 | 2 | AC    | 21.9  | 2019 | L3 | 15921 | 10625 |
| 68 | M | White | Former  | 2020 |   | SCC   | 23.6  | 2020 | L3 | 9752  | 16954 |
| 65 | M | White | Current | 2020 | 1 | Other | 19    | 2019 | L3 | 10244 | 16473 |
| 65 | M | White | Current | 2019 | 3 | AC    | 22.7  | 2019 | L3 | 9972  | 17447 |
| 63 | F | White | Former  | 2020 | 3 | AC    | 23.5  | 2019 | L3 | 14726 | 13810 |
| 71 | M | White | Current | 2019 | 2 | Other | 21.9  | 2019 | L3 | 11910 | 16968 |
| 75 | F | White | Former  | 2020 | 3 | AC    | 21.2  | 2019 | L3 | 21136 | 8187  |
| 64 | M | White | Former  | 2020 |   | Other | 23    | 2020 | L3 | 13765 | 16105 |
| 63 | F | White | Former  | 2019 | 1 | AC    | 23.8  | 2019 | L3 | 16528 | 13581 |

|    |   |       |         |      |   |       |      |      |    |       |       |
|----|---|-------|---------|------|---|-------|------|------|----|-------|-------|
| 79 | F | White | Former  | 2020 | 3 | AC    | 25.4 | 2020 | L3 | 18237 | 13993 |
| 79 | M | White | Former  | 2019 | 1 | Other | 21.9 | 2019 | L3 | 13214 | 19565 |
| 72 | M | White | Former  | 2019 | 1 | AC    | 27.4 | 2019 | L3 | 15101 | 18042 |
| 64 | F | White | Former  | 2019 | 1 | AC    | 20.8 | 2019 | L3 | 22249 | 11343 |
| 66 | F | Black | Former  | 2019 | 1 | AC    | 33.7 | 2019 | L3 | 24131 | 9558  |
| 74 | F | White | Former  | 2019 | 3 | AC    | 25.1 | 2019 | L3 | 21655 | 13534 |
| 81 | F | White | Former  | 2020 | 1 | SCC   | 30.9 | 2019 | L3 | 26673 | 9473  |
| 63 | M | White | Current | 2019 | 3 | Other | 27.2 | 2019 | L3 | 18541 | 18461 |
| 78 | F | White | Former  | 2020 | 1 | AC    | 30.7 | 2019 | L3 | 27389 | 10631 |
| 78 | M | White | Former  | 2019 |   | Other | 26.5 | 2019 | L3 | 23375 | 15492 |
| 85 | M | White | Former  | 2020 | 3 | Other | 27.2 | 2020 | L3 | 16328 | 23111 |
| 69 | F | White | Never   | 2019 | 3 | AC    | 26.9 | 2019 | L3 | 22259 | 17653 |
| 60 | M | White | Former  | 2019 | 2 | AC    | 26.7 | 2019 | L3 | 27005 | 13067 |
| 66 | F | White | Current | 2020 | 1 | AC    | 26.1 | 2020 | L3 | 26695 | 13486 |
| 53 | F | White | Never   | 2020 |   | AC    | 25.6 | 2020 | L3 | 17495 | 24027 |
| 63 | M | White | Former  | 2020 | 3 | AC    | 29.2 | 2019 | L3 | 21790 | 19868 |
| 60 | F | White | Former  | 2019 | 1 | AC    | 27.5 | 2019 | L3 | 21344 | 21025 |
| 60 | F | White | Current | 2020 | 3 | Other | 29.1 | 2020 | L3 | 28156 | 14888 |
| 63 | F |       | Current | 2020 | 4 | AC    | 24.2 | 2020 | L3 | 23895 | 19405 |
| 58 | F | White | Former  | 2019 | 3 | AC    | 27.7 | 2019 | L3 | 31784 | 11898 |
| 56 | M | White | Former  | 2019 | 3 | Other | 30.4 | 2019 | L3 | 24477 | 19613 |
| 84 | F | White | Former  | 2019 | 1 | AC    | 29.3 | 2019 | L3 | 24288 | 21415 |
| 76 | M | White | Former  | 2019 | 1 | SCC   | 28.4 | 2019 | L3 | 12819 | 35556 |
| 67 | M | White | Former  | 2019 | 1 | AC    | 31.8 | 2019 | L3 | 19380 | 31237 |
| 84 | M | White | Former  | 2020 | 2 | AC    | 29.9 | 2019 | L3 | 10132 | 41372 |
| 59 | M | White | Former  | 2020 | 1 | SCC   | 29.8 | 2019 | L3 | 15697 | 35895 |
| 67 | M |       | Former  | 2020 | 1 | AC    | 28.2 | 2019 | L3 | 25899 | 26307 |
| 73 | M | White | Former  | 2020 | 4 | Other | 30.5 | 2020 | L3 | 26366 | 26532 |
| 64 | F | White | Current | 2020 | 1 | AC    | 25.7 | 2020 | L3 | 30996 | 22503 |
| 66 | M | White | Former  | 2019 | 1 | AC    | 27.1 | 2019 | L3 | 14136 | 42744 |
| 61 | F | White | Former  | 2019 | 1 | AC    | 39.2 | 2019 | L3 | 29218 | 29547 |
| 83 | M | White | Former  | 2020 | 2 | Other | 28.8 | 2019 | L3 | 24262 | 34872 |
| 74 | F | White | Former  | 2019 | 3 | AC    | 31.4 | 2019 | L3 | 25960 | 34543 |
| 83 | F | White | Former  | 2019 | 1 | AC    | 29.8 | 2019 | L3 | 33604 | 27837 |
| 82 | M | White | Former  | 2020 | 1 | AC    | 30.5 | 2019 | L3 | 26419 | 38985 |
| 64 | M | White | Current | 2020 |   | AC    | 38.3 | 2020 | L3 | 22133 | 43640 |
| 57 | F | White | Former  | 2019 | 4 | AC    | 22.8 | 2019 | L3 | 14147 | 3829  |

<sup>a</sup>Listed are abdominal-level body fat area measurements determined using ImageJ software and computerized tomography (CT) scans of 994 unique subjects with non-small cell lung cancer tumors, along with their other characteristics. Only incomplete information was available for some subjects. *AC*, adenocarcinoma; *F*, female; *L*, lumbar; *M*, male; *SCC*, squamous cell carcinoma.

**Table S2.** STROBE statement with items recommended for reports of cohort studies<sup>a</sup>

| Item                         |         |                                                                                                                                                                                                                                                                                                                        | Page                         |
|------------------------------|---------|------------------------------------------------------------------------------------------------------------------------------------------------------------------------------------------------------------------------------------------------------------------------------------------------------------------------|------------------------------|
| Title and abstract           | 1       | (a) Indicate the study’s design with a commonly used term in the title or the abstract                                                                                                                                                                                                                                 | 1                            |
|                              |         | (b) Provide in the abstract an informative and balanced summary of what was done and what was found                                                                                                                                                                                                                    | 1                            |
| Introduction                 |         |                                                                                                                                                                                                                                                                                                                        |                              |
| Background/rationale         | 2       | Explain the scientific background and rationale for the investigation being reported                                                                                                                                                                                                                                   | 1-2                          |
| Objectives                   | 3       | State specific objectives, including any prespecified hypotheses                                                                                                                                                                                                                                                       | 2                            |
| Methods                      |         |                                                                                                                                                                                                                                                                                                                        |                              |
| Study design                 | 4       | Present key elements of study design early in the paper                                                                                                                                                                                                                                                                | 3                            |
| Setting                      | 5       | Describe the setting, locations, and relevant dates, including periods of recruitment, exposure, follow-up, and data collection                                                                                                                                                                                        | 3                            |
| Participants                 | 6       | (a) Give the eligibility criteria, and the sources and methods of selection of participants. Describe methods of follow-up<br>(b) For matched studies, give matching criteria and number of exposed and unexposed                                                                                                      | 3<br>NA                      |
| Variables                    | 7       | Clearly define all outcomes, exposures, predictors, potential confounders, and effect modifiers. Give diagnostic criteria, if applicable                                                                                                                                                                               | 3-4                          |
| Data sources/<br>measurement | 8*      | For each variable of interest, give sources of data and details of methods of assessment (measurement). Describe comparability of assessment methods if there is more than one group                                                                                                                                   | 4                            |
| Bias                         | 9       | Describe any efforts to address potential sources of bias                                                                                                                                                                                                                                                              | 4-5                          |
| Study size                   | 10      | Explain how the study size was arrived at                                                                                                                                                                                                                                                                              | 3                            |
| Quantitative variables       | 11      | Explain how quantitative variables were handled in the analyses. If applicable, describe which groupings were chosen and why                                                                                                                                                                                           | 4-5                          |
| Statistical methods          | 12      | (a) Describe all statistical methods, including those used to control for confounding<br>(b) Describe any methods used to examine subgroups and interactions<br>(c) Explain how missing data were addressed<br>(d) If applicable, explain how loss to follow-up was addressed<br>(e) Describe any sensitivity analyses | 4-5<br>4-5<br>NA<br>NA<br>NA |
| Results                      |         |                                                                                                                                                                                                                                                                                                                        |                              |
| Participants                 | 13<br>* | (a) Report numbers of individuals at each stage of study—eg numbers potentially eligible, examined for eligibility, confirmed eligible, included in the study, completing follow-up, and analysed<br>(b) Give reasons for non-participation at each stage<br>(c) Consider use of a flow diagram                        | 4-9<br><br>NA<br>NA          |
| Descriptive data             | 14<br>* | (a) Give characteristics of study participants (eg demographic, clinical, social) and information on exposures and potential confounders<br>(b) Indicate number of participants with missing data for each variable of interest                                                                                        | 4, 7<br><br>18               |

|                          |         |                                                                                                                                                                                                              |       |
|--------------------------|---------|--------------------------------------------------------------------------------------------------------------------------------------------------------------------------------------------------------------|-------|
|                          |         | (c) Summarise follow-up time (eg, average and total amount)                                                                                                                                                  | NA    |
| Outcome data             | 15<br>* | Report numbers of outcome events or summary measures over time                                                                                                                                               | NA    |
| Main results             | 16      | (a) Give unadjusted estimates and, if applicable, confounder-adjusted estimates and their precision (eg, 95% confidence interval). Make clear which confounders were adjusted for and why they were included | 4-10  |
|                          |         | (b) Report category boundaries when continuous variables were categorized                                                                                                                                    | 4-10  |
|                          |         | (c) If relevant, consider translating estimates of relative risk into absolute risk for a meaningful time period                                                                                             | NA    |
| Other analyses           | 17      | Report other analyses done—eg analyses of subgroups and interactions, and sensitivity analyses                                                                                                               | 4-10  |
| <i>Discussion</i>        |         |                                                                                                                                                                                                              |       |
| Key results              | 18      | Summarise key results with reference to study objectives                                                                                                                                                     | 10    |
| Limitations              | 19      | Discuss limitations of the study, taking into account sources of potential bias or imprecision. Discuss both direction and magnitude of any potential bias                                                   | 10-11 |
| Interpretation           | 20      | Give a cautious overall interpretation of results considering objectives, limitations, multiplicity of analyses, results from similar studies, and other relevant evidence                                   | 10-11 |
| Generalisability         | 21      | Discuss the generalisability (external validity) of the study results                                                                                                                                        | 10-11 |
| <i>Other information</i> |         |                                                                                                                                                                                                              |       |
| Funding                  | 22      | Give the source of funding and the role of the funders for the present study and, if applicable, for the original study on which the present article is based                                                | 12    |

<sup>a</sup>Page numbers refer to the submitted manuscript document. *STROBE*, Strengthening the Reporting of Observational Studies in Epidemiology.

**Table S3.** Sex-specific characteristics of the examined population at the L3 vertebral level<sup>a</sup>

|                                             | <i>Female</i><br>( <i>N</i> = 530) | <i>Male</i><br>( <i>N</i> = 417) | <i>P</i><br><i>value</i> <sup>b</sup> |
|---------------------------------------------|------------------------------------|----------------------------------|---------------------------------------|
| Age at time of analyzed CT (years)          | 66 (59, 74)                        | 68 (62, 74)                      | 0.003                                 |
| Race                                        |                                    |                                  | 0.800                                 |
| White                                       | 476 (90.2%)                        | 373 (90.8)                       |                                       |
| Black                                       | 40 (7.6%)                          | 27 (6.6)                         |                                       |
| Asian                                       | 5 (0.9%)                           | 6 (1.5)                          |                                       |
| Other                                       | 7 (1.3%)                           | 5 (1.2)                          |                                       |
| Smoking history at time of analyzed CT      |                                    |                                  | 0.001                                 |
| Current                                     | 123 (27.3%)                        | 82 (24.3)                        |                                       |
| Former                                      | 273 (60.7%)                        | 237 (70.3)                       |                                       |
| Never                                       | 54 (12.0%)                         | 18 (5.3)                         |                                       |
| FEV <sub>1</sub> (% predicted; 276 unknown) | 82 (68, 96)                        | 80 (64, 94)                      | 0.300                                 |
| DLCO (% predicted; 337 unknown)             | 69 (59, 83)                        | 81 (70, 97)                      | <0.001                                |
| Histology of NSCLC tumor                    |                                    |                                  | < 0.001                               |
| Adenocarcinoma                              | 360 (67.9)                         | 225 (54.0)                       |                                       |
| Squamous cell carcinoma                     | 112 (21.2)                         | 139 (33.3)                       |                                       |
| Other                                       | 58 (10.9)                          | 53 (12.7)                        |                                       |
| Pathological stage of NSCLC tumor           |                                    |                                  | 0.015                                 |
| I                                           | 285 (60.9%)                        | 179 (50.3)                       |                                       |
| II                                          | 98 (20.9%)                         | 102 (28.7)                       |                                       |
| III                                         | 46 (9.8%)                          | 45 (12.6)                        |                                       |
| IV                                          | 39 (8.3%)                          | 30 (8.4)                         |                                       |
| Body mass index                             | 26.7 (23.1, 30.8)                  | 27.3 (24.6, 30.6)                | 0.050                                 |
| Body fat area in analyzed CT at L3 level    |                                    |                                  |                                       |
| Subcutaneous                                | 22,169 (15,044, 31,007)            | 16,399 (12,468, 22,887)          | < 0.001                               |
| Visceral                                    | 13,554 (8,258, 19,990)             | 24,292 (30,478, 55,315)          | < 0.001                               |
| Total                                       | 37,452 (25,091, 50,683)            | 42,228 (30,478, 55,315)          | < 0.001                               |
| Visceral fat index                          | 0.38 (0.30, 0.45)                  | 0.58 (0.50, 0.64)                | < 0.001                               |

<sup>a</sup>Number and percentage among known values, and median and inter-quartile range values are shown for categorical and continuous variables, respectively. *CT*, computerized tomography; *DLCO*, diffusion capacity of lungs for carbon monoxide; *FEV<sub>1</sub>*, forced expiratory volume at 1 second; *NSCLC*, non-small cell lung carcinoma.

<sup>b</sup>Fisher's exact and Welch t tests for categorical and continuous variables, respectively.
